# **Extracellular electron uptake by two *Methanosarcina* species**

## **Authors:**

Mon Oo Yee<sup>1</sup>, Oona Snoeyenbos-West<sup>1,2,a</sup>, Bo Thamdrup<sup>1</sup>, Lars DM Ottosen<sup>2</sup>, Amelia-Elena Rotaru<sup>1\*</sup>

<sup>1</sup> Nordcee, Department of Biology, University of Southern Denmark, Odense, Denmark

<sup>2</sup> Department of Engineering, University of Aarhus, Aarhus, Denmark

<sup>a</sup>(Current address) Department of Microbiology & Molecular Genetics, Michigan State University, East Lansing, USA

\*Correspondence to: [arotaru@biology.sdu.dk](mailto:arotaru@biology.sdu.dk)

## **Abstract**

Direct electron uptake by prokaryotes is a recently described mechanism with a potential application for energy and CO<sub>2</sub> storage into value added chemicals. Members of *Methanosarcinales*, an environmentally and biotechnologically relevant group of methanogens, were previously shown to retrieve electrons from an extracellular electrogenic partner performing Direct Interspecies Electron Transfer (DIET) and were therefore proposed to be electroactive. However, their intrinsic electroactivity has never been examined. In this study, we tested two methanogens belonging to *Methanosarcina*, *M. barkeri* and *M. horonobensis*, regarding their ability to accept electrons directly from insoluble electron donors like other cells, conductive particles and electrodes. Both methanogens were able to retrieve electrons from *Geobacter metallireducens* via DIET. Furthermore, DIET was also

stimulated upon addition of electrically conductive granular activated carbon (GAC) when each was co-cultured with *G. metallireducens*. However, when provided with a cathode poised at  $-400$  mV (vs SHE), only *M. barkeri* could perform electromethanogenesis. In contrast, the strict hydrogenotrophic methanogen, *Methanobacterium formicicum*, did not produce methane regardless of the type of insoluble electron donor provided (*Geobacter* cells, GAC or electrodes). A comparison of functional gene categories between *Methanobacterium* and the two *Methanosarcinas* revealed a higher abundance of genes associated with extracellular electron transfer in *Methanosarcina* species. Between the two *Methanosarcina* we observed differences regarding energy metabolism, which could explain dissimilarities concerning electromethanogenesis at fixed potentials. We suggest that these dissimilarities are minimized in the presence of an electrogenic DIET partner (i.e. *Geobacter*), which can modulate its surface redox potentials by adjusting the expression of electroactive surface proteins.

## **Introduction**

Methanogenesis or biological methane formation by methanogenic archaea is a vital process in the global carbon cycle (Falkowski et al., 2008). As such, the relatively recent discovery of direct external electron transfer in methanogens may have important implications. A few studies have shown that methanogens belonging to *Methanosarcinales* are able to accept electrons directly from an electrogenic partner by Direct Interspecies Electron Transfer (DIET) via conductive proteins located on the surface of the electrogen (Rotaru et al., 2014a, 2014b). The only methanogens shown to date to carry out DIET belong to *Methanosarcinales*— *Methanosarcina barkeri* (Rotaru et al., 2014a) and *Methanotherix harundinacea* (Rotaru et al., 2014b). Both methanogenic species formed aggregates when co-cultured with *Geobacter metallireducens*, emphasizing the need for physical contact. However, the mechanism

employed by DIET methanogens to retrieve electrons from the electrogen is poorly understood. A glimpse at this mechanism was provided in a recent comparative transcriptomic study (Holmes et. al, 2018, submitted). In this study the transcriptomes of DIET co-cultures (*G. metallireducens* – *M. barkeri*) were compared to those of co-cultures performing interspecies H<sub>2</sub>-transfer (*Pelobacter carbinolicus* – *M. barkeri*). During DIET, *M. barkeri* had higher expression of membrane bound redox active proteins like cupredoxins, thioredoxins, pyrroloquinoline, and quinone- ,cytochrome- or Fe-S containing proteins (Holmes et al., 2018, submitted). Still, the exact mechanism of electron uptake during DIET has not been validated and warrants further investigation.

Moreover, DIET interactions between *G. metallireducens* and *M. barkeri* were stimulated at the addition of conductive particles, such as GAC (Liu et al., 2012), carbon cloth (Chen et al., 2014a), biochar (Chen et al., 2014b), or magnetite (Wang et al., 2018). On the other hand, the addition of non-conductive particles like glass beads (Rotaru et al., 2018) or cotton cloth did not stimulate DIET associations (Chen et al., 2014a).

Numerous mixed methanogenic communities degrading various substrates were also stimulated by electrically conductive particles made of carbon (Lee et al., 2016; Lin et al., 2017b; Rotaru et al., 2018; Zhang et al., 2017), iron-oxide minerals (Cruz Viggi et al., 2014; Jing et al., 2017; Ye et al., 2018; Zheng et al., 2015; Zhuang et al., 2015), and also stainless steel (Li et al., 2017). In this paper we will call this phenomenon mineral-syntrophy or MIET (conductive particle-Mediated Interspecies Electron Transfer). The methanogens mostly enriched at the addition of electrically conductive particles were DIET-related methanogens like *Methanosarcina* sp. (Dang et al., 2016; Lei et al., 2016; Zheng et al., 2015) or *Methanosaeta* sp. (Li et al., 2017; Zhao et al., 2017). However, exceptions were observed since sometimes electrically conductive particles enriched for hydrogenotrophic methanogens such as

62 *Methanospirillum* sp. (Lee et al., 2016) or *Methanobacterium* sp. (Lin et al., 2017a; Zhuang et al.,  
63 2015).

64 A hydrogenotrophic species belonging to the genus *Methanobacterium*, *M. palustris*, was later  
65 suggested to carry out electromethanogenesis as it produced CH<sub>4</sub> when subjected to a cathode potential  
66 of – 500 mV versus the standard hydrogen electrode (SHE) (Cheng et al., 2009). Although H<sub>2</sub> can be  
67 theoretically generated electrochemically at -500 mV ( redox potential of H<sup>+</sup>/H<sub>2</sub> couple at pH 7 is – 414  
68 mV) (Buckel and Thauer, 2013), the authors suggested that this methanogen could directly receive  
69 electrons from the cathode, based on low hydrogen concentrations and high current density (Cheng et  
70 al., 2009).

71 Afterwards, other studies have used less negative potentials around - 400 mV (vs. SHE) where H<sub>2</sub> is  
72 unlikely to be generated electrochemically with carbon-based electrodes (Batlle-Vilanova et al., 2014).  
73 Under such conditions, both a mixed hydrogenotrophic methanogenic community (Fu et al., 2015) and  
74 a pure culture of a H<sub>2</sub>-utilizing methanogen (*Methanobacterium* sp. strain IM1) (Beese-Vasbender et  
75 al., 2015) were suggested to reduce CO<sub>2</sub> using cathodic electrons directly. Later studies on  
76 *Methanococcus maripaludis*, demonstrated that extracellular enzymes would generate H<sub>2</sub> and formate  
77 enabling hydrogenotrophic methanogenesis on cathodes (Deutzmann et al., 2015; Lienemann et al.,  
78 2018; Lohner et al., 2014).

79 Until now electromethanogenesis was only demonstrated for hydrogenotrophic methanogens. Yet, no  
80 hydrogenotrophs were shown to be capable of DIET (Rotaru et al., 2014b). Conversely, none of the  
81 two methanogens capable of DIET have been tested if they are capable of electron uptake from a  
82 cathode. Here we investigate the ability to carry DIET and electromethanogenesis in three  
83 methanogenic species, two *Methanosarcina* and a *Methanobacterium*. While both *Methanosarcina*

species grew by DIET, only *M. barkeri* grew on the cathode at - 400 mV vs. SHE. This indicates that DIET-uptake routes from cathodes and other cells might differ between *Methanosarcina* species.

## **Materials and Methods**

### **Microorganism strains and cultivation conditions**

*Methanosarcina barkeri* MS (DSM 800) and *Methanosarcina horonobensis* HB-1 (DSM 21571) were purchased from the German culture collection DSMZ while *Methanobacterium formicicum* (NBRC 100475) was from the Japanese culture collection NBRC. *Geobacter metallireducens* GS-15 was sent to us by Dr. Sabrina Beckmann from the University of New South Wales, Australia.

Routine cultivation was performed under strict anaerobic conditions in serum bottles sealed with butyl rubber stoppers and incubated statically at 37°C. All the microorganisms had been adapted to grow in DSMZ medium 120c with the following modifications: 1 g/L NaCl, 0.5g/L yeast, and no tryptone (Rotaru et al., 2014a). During incubations in co-cultures or for electrochemical experiments, sulphide and yeast extract was omitted. When grown in pure cultures, *Methanosarcina* species were provided with 30 mM acetate and 20 mM methanol as methanogenic substrates, while *M. formicicum* was provided with 150 kPa of H<sub>2</sub>:CO<sub>2</sub> (80:20) in the headspace. *G. metallireducens* was routinely grown with 20 mM ethanol and 56 mM ferric citrate. All media and cultures were prepared and kept under a N<sub>2</sub>:CO<sub>2</sub> (80:20) atmosphere.

The co-cultures of *Geobacter* and methanogens were initiated with 0.5 mL of *G. metallireducens* and 1 mL of acetate-grown *Methanosarcina*-species or H<sub>2</sub>-grown *M. formicicum* inoculated into 8.5 ml of the media prepared as above. Incubations were carried out in 20 ml pressure vials. For the co-cultures ethanol (10 mM) was added as electron donor and CO<sub>2</sub> was the sole electron acceptor. When noted,

sterile granular activated carbon (GAC) was added at a concentration of 25 g/L and prepared as described before (Rotaru et al., 2018).

## **Electrochemical set up and measurements**

We used bioelectrochemical reactors with a standard dual chamber configuration as shown in **Fig. S1**. Two-chamber glass bottles were purchased from Adams & Chittenden Scientific Glass (USA) with side ports fitted with butyl septa to allow for medium transfer, sampling, and introduction of a reference electrode. Each chamber of the reactors had a total volume of 650 ml with a flange diameter of 40 mm and the chambers were separated by a Nafion™ N117 proton exchange membrane (Ion Power) held by an O-ring seal with a knuckle clamp.

Both the working and counter electrodes were made of graphite (Mersen MI Corp., Greenville USA) with dimensions of 2.5 cm x 7.5 cm x 1.2 cm thus a total projected surface area of 61.5 cm<sup>2</sup>. The working and counter electrodes were coupled to titanium wires, which pierced through rubber stoppers fitted into the main opening of each chamber. A 2 cm deep and 2 mm wide hole was drilled on the short side of the electrode and a 12.5 cm long, 2 mm wide titanium rod (Alfa-aesar, DE) was inserted and sealed from the outside with bio-compatible non-conductive epoxy. Electrodes with a resistance of less than 10  $\Omega$  were used to ensure proper electrical connections. The assembled electrodes were introduced into the chamber via the main opening and 2 mm-wide holes were drilled in the black rubber stopper to allow access of the titanium rod. After autoclaving the reactors, sterile medium was transferred into the reactors anaerobically and aseptically. Sterile (bleach and ethanol series) reference electrodes were lodged through a side port in the working electrode chamber at a distance of about 1 cm from the surface of the working electrode. After lodging the electrodes, degassing with N<sub>2</sub>:CO<sub>2</sub>

(80:20) for circa 30 minutes in each reactor chamber ensured anaerobic conditions. When the pre-cultures were in mid exponential phase, they were inoculated (20%) into fresh medium in the cathodic chamber following sterile anoxic techniques to a final volume of 550 ml leaving a headspace of approximately 100 mL in each chamber. The approximate cell numbers at the time of inoculation into the electrochemical reactors for *M. barkeri*, *M. formicicum* and *M. horonobensis* were  $2.6 \times 10^7$  cells/mL,  $8.2 \times 10^7$  cells/mL and  $6.7 \times 10^6$  cells/mL respectively. Cell counts were done with microscopic examination using DAPI (1 µg/mL) stained cells.

The reference electrodes used were leak-free Ag/AgCl reference electrodes (3.4M KCl) (CMA Microdialysis, Sweden), which are 242 mV above the standard hydrogen electrode (SHE) according to the manufacturer and our own measurements against a Hydroflex<sup>®</sup> reference electrode used as NHE (normal hydrogen electrode). The difference between NHE and SHE is experimentally negligible (Smith and Stevenson, 2007). All potentials in this paper from here onwards are reported vs. SHE by adjusting accordingly from the Ag/AgCl reference electrodes values. Cathode poisoning and electrochemical measurements were carried with a multichannel potentiostat (MultiEmstat, Palmsens, NL) operated by the Multitrace software (Palmsens, NL).

## **Analytical measurements and calculations**

Headspace samples for CH<sub>4</sub> and H<sub>2</sub> analysis were taken with hypodermic needles and kept in airtight exetainers until measurement. Because we noticed small gases like methane and hydrogen passed the cation permeable membrane between the chambers, headspace gas was sampled and measured from both the working and counter electrode chambers and the sum was considered as the total gas production. Methane (CH<sub>4</sub>) and hydrogen gas (H<sub>2</sub>) were measured on a Trace 1300 gas chromatograph

(Thermo-Scientific) with a TracePLOT™ TG-BOND Msieve 5A column and a thermal conductivity detector (TCD). The carrier gas was argon at a flow rate of 25 mL/min. The injector, oven and detector temperatures were 150°C, 70°C and 200°C respectively. The detection limit for CH<sub>4</sub> and H<sub>2</sub> was ca. 500 ppm for both. The concentration unit was converted to molarity by using the ideal gas law ( $pV = nRT$ ) under standard conditions, where  $p = 1$  atm,  $V$  is volume of the gaseous phase (L),  $n$  is amount of gas (mol),  $R$  is the gas constant (0.08205 atmL/molK) and  $T = 298.15$  K. For ethanol detection, 0.5 mL samples were filtered (0.2 µm pore size) into appropriate sampling vials and were heated for 5 mins at 60°C. The headspace gas was then pass through the Trace 1300 gas chromatograph (Thermo-Scientific) with a TRACE™ TR-Wax column and detected by a flame ionization detector (FID). Nitrogen gas at a flow of 1 mL/min was used as the carrier and the injector, oven and detectors were kept at 220°C, 40°C and 230°C respectively. Short chained volatile fatty acids (VFA) were analysed with a Dionex™ ICS-1500 Ion Chromatography system, using a Dionex™ IonPac™ AS22 IC Column and a mixture of 1.4 mM NaHCO<sub>3</sub> and 4.5 mM Na<sub>2</sub>CO<sub>3</sub> as the eluent fitted with an electron capture detector (ECD) at 30 mA.

## Genome comparison

Genomes for all tested microorganisms were available at the JGI integrated microbial genomes and microbiomes. Functional category comparisons and pairwise average nucleotide identity (ANI) were determined using the IMG/M- “Compare Genomes” tools. The IMG genome IDs of the studied *M. barkeri*, *M. horonobensis* and *M. formicicum* used were 2630968729, 2627854269 and 2645727909 respectively. The gene functions were analysed from the annotated names of all the protein coding genes retrieved from the National Center for Biotechnology Information (NCBI) database. The accession numbers used were NZ\_CP009528, NZ\_CP009516 and NZ\_LN515531 for *M. barkeri*, *M. horonobensis* and *M. formicicum* respectively. For searching the cytochrome motif (CxxCH), the 3of5



pattern matching application (Seiler et al., 2006) in addition to manual search was used to scan through all the genomes.

## **Results and Discussion**

It was previously shown that two *Methanosarcinales*, *M. barkeri* and *M. harundinacea* grew via DIET whereas strict hydrogenotrophs did not (Rotaru et al., 2014a, 2014b). This indicated that the *Methanosarcinales* members were likely capable of extracellular electron uptake. Here we show that indeed *M. barkeri* could retrieve electrons not only from an exoelectrogen but also from an electrode poised at - 400 mV (non-hydrogen generating conditions) to carry electromethanogenesis. As expected, a hydrogenotrophic methanogen *M. formicicum* did not carry electromethanogenesis under this condition. We tested a non-hydrogenotrophic *Methanosarcina*, *M. horonobensis* for extracellular electron uptake from cells and electrodes, and we observed it could only retrieve electrons from exoelectrogenic *Geobacter* and from granular activated carbon but not from electrodes.

### **A strict hydrogenotroph, *Methanobacterium formicicum*, was unable to produce methane using extracellular electron uptake from cells or solid electron donors**

*M. formicicum* was chosen as the representative hydrogenotrophic methanogen due to its low hydrogen uptake threshold (approximately 6 nM (Lovley, 1985)). Previously it was demonstrated that the electrogen *G. metallireducens* could not establish DIET co-cultures with the hydrogenotroph *M. formicicum* even after 6 months of incubation (Rotaru et al., 2014b). This result was anticipated because *G. metallireducens* is a respiratory organism without the genetic potential to produce H<sub>2</sub> (Aklujkar et al., 2009; Shrestha et al., 2013), which was also demonstrated in early physiological experiments (Cord-Ruwisch et al., 1998). However, it is unknown if conductive particles might enable

interactions between a strict hydrogenotroph like *M. formicicum* and *G. metallireducens*. This became especially relevant because hydrogenotrophic methanogenesis by *M. formicicum* was enhanced by conductive carbon nanotubes (Salvador et al., 2017). Thus in this study we tested if *M. formicicum* was capable to establish syntrophic co-cultures with *G. metallireducens* via conductive GAC.

*M. formicicum* co-cultured with the exoelectrogen *G. metallireducens* did not generate methane even after 120 days regardless of the presence or absence of conductive particles (**Fig. 1A & B**). Conductive GAC did not aid the abiotic oxidation of ethanol (**Fig. 1C**). Control experiments with only ethanol-fed *G. metallireducens* provided with GAC, revealed that *Geobacter* oxidized ethanol incompletely to  $6.72 \pm 0.02$  mM acetate (**Fig. S2**). Incomplete oxidation of ethanol also happened in GAC amended co-cultures of *Geobacter* and *M. formicicum* (**Fig. 1A**). GAC was likely used as a poor electron acceptor by *G. metallireducens*. Without GAC, *Geobacter* could not oxidize ethanol alone (Shrestha et al., 2013). *M. formicicum* did not utilize ethanol alone in the presence or absence of conductive particles (data not shown).

We further used *M. formicicum* to test whether cryptic electrogenic hydrogen could fuel methanogenesis in our bioelectrochemical setup. It is well accepted that electrochemical hydrogen gas evolution from a graphite electrode is unlikely at - 400 mV under physiological conditions due to high overpotentials (Batlle-Vilanova et al., 2014; Beese-Vasbender et al., 2015). Indeed, hydrogen gas was not detected in abiotic reactors at - 400 mV except at day 27, when it reached at most  $0.16 \pm 0.23$   $\mu$ M (**Fig. 2A**). Still, since the inoculum was a mid-exponential active culture, there was a possibility that microbial enzymes attach onto the electrode to produce hydrogen or formate (Deutzmann et al., 2015). *M. formicicum* is particularly well-suited for such a test because, the H<sub>2</sub> threshold of such a strict hydrogenotroph is lower than that of *Methanosarcina*-methanogens (Thauer et al., 2008, 2010). For

instance, the dissolved  $H_2$  threshold of the hydrogenotrophic *M. formicicum* (~ 6 nM) is ~60 times lower than that of *M. barkeri* (296 nM – 376 nM) (Kral et al., 1998; Lovley, 1985). In electrochemical reactors with *M. formicicum*, no hydrogen or methane was detected and no substantial current draw was observed at – 400 mV (**Fig. 2B**). Thus, *M. formicicum* could not carry electromethanogenesis neither via electrochemical nor enzyme-mediated  $H_2$  in our bioelectrochemical set-up.

### **The non-hydrogenotrophic *Methanosarcina horonobensis* produced methane using extracellular electron uptake from *Geobacter* directly or via conductive particles**

The non-hydrogenotrophic, *Methanosarcina horonobensis* paired syntrophically with *G. metallireducens* with or without conductive particles as electric conduit (**Fig 3A & B**). This is the second *Methanosarcina* species shown to be capable of electron uptake from *Geobacter* (Rotaru et al., 2014a) and the second non-hydrogenotroph besides *Methanothrix harundinacea* capable of DIET (Rotaru et al., 2014b). Theoretically, *G. metallireducens* could oxidize ethanol to acetate only if they could use the methanogen as an electron acceptor (Eqn. 3 & 4). The acetate is then further disproportionated by the acetoclastic methanogens to produce methane and  $CO_2$  (Eqn. 5). During DIET we expect a conversion of 1 mol ethanol to 1.5 mol methane according to equations 3 to 5. As predicted, in the *G. metallireducens* – *M. horonobensis* co-cultures, the syntroph oxidized  $8.8 \pm 0.4$  mM ethanol providing the reducing equivalents (directly and via acetate) to generate  $13.1 \pm 0.8$  mM  $CH_4$  by the methanogen. These co-cultures achieved stoichiometric recoveries of  $98.5 \pm 3.3$  %. Similar recoveries ( $109 \pm 18.5$  %) were also observed at the addition of conductive particles. Single species controls with GAC showed that ethanol could not be converted to methane by the syntroph or the methanogen alone (**Fig. 3C & S2**).

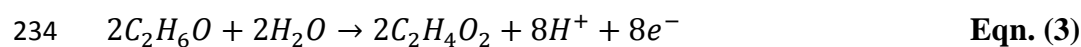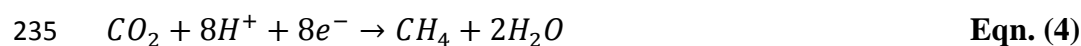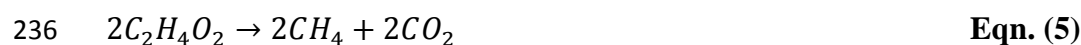

237 Co-cultures of *G. metallireducens* and *M. horonobensis* could not carry interspecies hydrogen transfer  
 238 1) because *G. metallireducens* is a strict respiratory microorganism which cannot ferment ethanol to  
 239 generate hydrogen (Shrestha et al., 2013) and 2) because *M. horonobensis* is unable to use H<sub>2</sub> or  
 240 formate as electron donors for their metabolism (Shimizu et al., 2010). Co-cultures of *G.*  
 241 *metallireducens* and *M. barkeri* with and without GAC were run in parallel and we found that the time  
 242 taken to establish these syntrophic interactions were similar among the two co-cultures (**Fig. S3**) as  
 243 well as to previous studies (Liu et al., 2012; Rotaru et al., 2014a).

#### 244 **Electroactivity of *Methanosarcina* species**

245 The ability of *Methanosarcina barkeri* and *Methanosarcina horonobensis* to grow by MIET or DIET  
 246 with *G. metallireducens* suggested that they are capable of extracellular electron uptake. We tested this  
 247 by providing the two species solely with an electrode poised at – 400 mV as electron donor. Only  
 248 *Methanosarcina barkeri* was capable of methanogenesis under these conditions. This is the first  
 249 demonstration of a *Methanosarcina* acting as an electrotroph when provided with a cathode as the sole  
 250 source of electrons.

251 *Methanosarcina barkeri* produced significantly more methane (approximately  $2.2 \pm 0.4$  times) using an  
 252 electrode as sole electron donor in reactors poised at - 400 mV compared to open circuit control  
 253 reactors (**Fig. 4A**). In all the triplicate reactors, the methane production was significantly higher

( $P < 0.001$ ) from day 14 onwards until it plateaued. A similar trend was reflected in the current consumed. The hydrogen concentrations after day 7 remained very low ( $0.039 \pm 0.008$  mM). Methane production in the open-circuit control was attributed to substrates carried over in the inoculum. Since both control reactors and poised reactors had the same amount of carry-over substrates, circa  $2.58 \pm 0.3$  mM of methane could be solely credited to the addition of electricity.

Surprisingly, *Methanosarcina horonobensis* which could grow by DIET and MIET was incapable of electromethanogenesis (**Fig. 4B**). Similar to *M. barkeri* the hydrogen gas concentrations were low ( $0.042 \pm 0.02$  mM) and  $H_2$  accumulated a week later than with *M. barkeri*. To further explain why these two *Methanosarcina* species which were similarly capable of DIET and MIET behaved dissimilarly on cathodes poised at - 400 mV, we compared their genomes.

#### **Genotypic characteristics of the two *Methanosarcina* versus *M. formicicum***

While both *Methanosarcina* species were able to carry out DIET and MIET, only *M. barkeri* produced methane by electromethanogenesis at - 400 mV (**Table 1**). As a first step towards determining what could lead to differences in their ability to carry cathodic methanogenesis, we compared genotypic differences between the two species and against the hydrogenotroph *M. formicicum* (**Table 2 & 3**).

Compared to *M. formicicum*, both *Methanosarcina* encode in their genomes thrice the amount of electron transport genes and twice the amount of genes for cell surface proteins and transport (**Table 2 & 3**). Representing cell surface proteins, S-layer proteins were only present in *Methanosarcina* species but not in *Methanobacterium*. S-layer proteins have been previously proposed to play a role in extracellular electron transfer (EET) in *Methanosarcina* relatives such as the anaerobic methanotrophic archaea (ANME-2) (McGlynn, 2017; McGlynn et al., 2015; Timmers et al., 2017). Transport proteins

(iron carriers or aminoacid transporters) as well as thioredoxins and ferredoxins were also better represented in *Methanosarcina* genomes compared to *Methanobacterium* (**Table 3**). The abundance of EET genes and surface proteins assumed to be involved in EET indicates that extracellular electron transport was indeed more likely to occur in the two *Methanosarcinas* than in *M. formicicum*.

When contrasting the genomes of the two *Methanosarcina* species we observed 79% average nucleotide identity (ANI) including predicted differences regarding iron transport, electron transport and nitrogen fixation (**Table 2**). *M. horonobensis* encoded for more 23% more iron carriers, 16% more electron transport proteins (including three multiheme c-type cytochromes), 185% more small molecule interaction proteins and 16 times more mobile elements than *M. barkeri* (**Table 2**). On the other hand, *M. barkeri* encoded for more 86% more N<sub>2</sub>-fixation proteins and 13% more heme-biosynthesis proteins.

Beside these differences, we also observed significant differences regarding energy metabolism (**Table 3**). *M. barkeri* utilizes hydrogen-cycling for its energy metabolism employing the energy-converting hydrogenase (Ech) as proton pump (Kulkarni et al., 2018). The differences in energy conservation were obvious with *M. barkeri* using the energy-converting hydrogenase (Ech), while *M. horonobensis* only encoded the Rnf complex (Buckel and Thauer, 2013, 2018; Meuer et al., 2002). Ech-hydrogenases couple the reduction of protons with ferredoxin (Fdx<sup>-</sup>) to the production of a proton motive force according to the reaction:  $\text{Fdx}^- (\text{red}) + 2\text{H}^+ \rightleftharpoons \text{Fdx} (\text{ox}) + \text{H}_2 + \Delta\mu\text{H}^+ / \Delta\mu\text{Na}^+$  (Thauer et al., 2008). In contrast, the Rnf-complex is thought to produce a Na<sup>+</sup> ion gradient with NAD<sup>+</sup> in the process (Buckel and Thauer, 2018). To our knowledge, apart from *M. horonobensis*, the Rnf complex is only described in three other *Methanosarcina* species, yet fully characterized solely in *M. acetivorans* (Li et al., 2006, 2007; Schlegel et al., 2012; Suharti et al., 2014). In the other two *Methanosarcinas*, *M. lacustris* and *M.*

297 *thermophila*, the Rnf-complex was only predicted via genome mining (Wang et al., 2011). The Rnf  
298 complex was also described in the genomes of ANME-2 archaea – close relatives of  
299 *Methanosarcinales* (Wang et al., 2014), which were foreseen to carry DIET with sulfate reducing  
300 bacteria (McGlynn et al., 2015). These operational and energetic differences in the proteins used for  
301 energy metabolism, suggests that *Methanosarcina* with variations in H<sup>+</sup>/Na<sup>+</sup>-pumping could carry  
302 EET differently. Also the redox coupling of the Rnf and the Ech differs as one uses c-cytochromes and  
303 the other Fe-S centers, which could impact the overall redox potential of the cell surface.

304 But why would differences in energy metabolism and cell surface matter for growth on electrodes but  
305 not in co-culture with an electrogen? It is possible that *Geobacter* coordinates its cytochrome  
306 expression depending on the DIET partner or conductive mineral. It has been shown that the *Geobacter*  
307 were capable to modulate their redox potential by coordinated expression of extracellular cytochromes  
308 depending on the voltage applied or iron oxide (Chan et al., 2017; Ishii et al., 2018; Levar et al., 2017).  
309 If *Geobacter* modulates the expression of extracellular cytochromes to match the redox active  
310 molecules on the surface of the methanogen, the latter would not need to modulate its electron  
311 accepting machinery during DIET/MIET. On the other hand, electromethanogenesis at a set potential (  
312 – 400 mV in this study) is unlikely to match the redox requirements of each type of electroactive  
313 *Methanosarcina*.

## 314 **Implications**

315 Our understanding of interspecies interactions impacts carbon cycling in both natural and man-made  
316 environments. Recently environmentally relevant *Methanosarcinales* methanogens were shown to  
317 interact via direct electron transfer with electrogenic *Geobacter* (Rotaru et al., 2014a, 2014b, 2015)

However, *Methanosarcina* have never been shown to carry electron uptake from an electrode. Here we demonstrated that a *Methanosarcina* capable of DIET, *M. barkeri* could also retrieve electrons from a cathode, under non-hydrogenotrophic conditions.

The diversity of methanogens capable of DIET is poorly known, with only two species of *Methanosarcinales* previously shown to do DIET (Rotaru et al., 2014a, 2014b). Here we demonstrated that a third *Methanosarcina* species, the non-hydrogenotrophic *M. hornobensis* performed DIET with *Geobacter*. However, *M. hornobensis* could not grow on a cathode with a fixed potential at  $-400$  mV. Nevertheless, *M. hornobensis* is a better candidate for understanding electron uptake in DIET-fed *Methanosarcina*. This is because *M. hornobensis* is fast growing as single cells rather than rosettes on freshwater media, which makes it amenable for genetic studies. Besides, freshwater conditions are compatible with downstream co-cultivation of the gene-deletion mutants together with *Geobacter*. This is unlike *M. barkeri* which has to be grown on high salt media in order to obtain single cell colonies for genetic studies (Kulkarni et al., 2009, 2018; Mand et al., 2018) and then adapted to freshwater conditions prior to co-cultivation with *Geobacter*. This makes *M. hornobensis* a better candidate for genetic studies to investigate in detail the mechanisms of electron uptake in *Methanosarcina* growing by DIET or MIET.

## **Conclusion**

Three methanogens were investigated for their ability to do DIET, MIET or electron uptake from cathodes. Out of the two *Methanosarcina* tested, only the metabolically versatile *M. barkeri* was able to carry out all three forms of electron uptake. To our knowledge, this is the first study to show a *Methanosarcina* in pure culture performing electromethanogenesis. On the other hand, the strict



hydrogenotrophic *M. formicicum* was unable to receive electrons from any type of solid surfaces tested in this study. A closer look into their genomes showed fundamental differences; compared to *Methanobacterium*, the *Methanosarcina* appeared to be better equipped for extracellular electron transport encoding for S-layer proteins, but also more electron transport proteins and transport proteins in general. Between the two *Methanosarcina* we observed disparities in areas such as energy metabolism, extrachromosomal functions and ion (i.e. iron) transporters . While *M. horonobensis* participated only in DIET and MIET, the inability of electromethanogenesis is a matter requiring further exploration. Compared to *M. barkeri*, *M. horonobensis* is arguably a more suitable candidate as a methanogenic model organism for studying extracellular electron uptake mechanisms due to its amenable culture conditions for genetic studies. A detailed understanding of EET mechanisms in environmentally widespread *Methanosarcina*, will be important for our understanding of the global methane and carbon cycles as well as for improving anaerobic digestion and biogas upgrading.

## Acknowledgements

This work was funded by the Innovationsfond grant number: 4106-00017. We would like to thank Lasse Ørum Smidt and Heidi Grøn Jensen for lab assistance.

## Author contribution

MOY and AER conceived the study with support from BT and LDMO. MOY performed all experiments with support from OSW. MOY analysed the data with support from AER. MOY wrote the manuscript. All authors (MOY, AER, BT, OSW and LDMO) contributed to drafting and editing the manuscript.

## References

- Aklujkar, M., Krushkal, J., Dibartolo, G., Lapidus, A., Land, M. L., and Lovley, D. R. (2009). The genome sequence of *Geobacter metallireducens*: Features of metabolism, physiology and regulation common and dissimilar to *Geobacter sulfurreducens*. *BMC Microbiol.* 9, 1–22. doi:10.1186/1471-2180-9-109.
- Batlle-Vilanova, P., Puig, S., Gonzalez-Olmos, R., Vilajeliu-Pons, A., Bañeras, L., Balaguer, M. D., et al. (2014). Assessment of biotic and abiotic graphite cathodes for hydrogen production in microbial electrolysis cells. *Int. J. Hydrogen Energy* 39, 1297–1305. doi:10.1016/j.ijhydene.2013.11.017.
- Beese-Vasbender, P. F., Grote, J.-P., Garrelfs, J., Stratmann, M., and Mayrhofer, K. J. J. (2015). Selective microbial electrosynthesis of methane by a pure culture of a marine lithoautotrophic archaeon. *Bioelectrochemistry* 102, 50–55. doi:10.1016/j.bioelechem.2014.11.004.
- Buckel, W., and Thauer, R. K. (2013). Energy conservation via electron bifurcating ferredoxin reduction and proton/Na<sup>+</sup> translocating ferredoxin oxidation. *Biochim. Biophys. Acta - Bioenerg.* 1827, 94–113. doi:10.1016/j.bbabbio.2012.07.002.
- Buckel, W., and Thauer, R. K. (2018). Flavin-based electron bifurcation, ferredoxin, flavodoxin, and anaerobic respiration with protons (Ech) or NAD<sup>+</sup>(Rnf) as electron acceptors: A historical review. *Front. Microbiol.* 9. doi:10.3389/fmicb.2018.00401.
- Chan, C. H., Levar, C. E., Jiménez-Otero, F., and Bond, D. R. (2017). Genome scale mutational analysis of *Geobacter sulfurreducens* reveals distinct molecular mechanisms for respiration and

379 sensing of poised electrodes versus Fe(III) oxides. *J. Bacteriol.* 199, 1–18. doi:10.1128/JB.00340-  
380 17.

381 Chen, S., Rotaru, A.-E., Liu, F., Philips, J., Woodard, T. L., Nevin, K. P., et al. (2014a). Carbon cloth  
382 stimulates direct interspecies electron transfer in syntrophic co-cultures. *Bioresour. Technol.* 173,  
383 82–86. doi:10.1016/j.biortech.2014.09.009.

384 Chen, S., Rotaru, A.-E., Shrestha, P. M., Malvankar, N. S., Liu, F., Fan, W., et al. (2014b). Promoting  
385 Interspecies Electron Transfer with Biochar. *Sci. Rep.* 4, 1–7. doi:10.1038/srep05019.

386 Cheng, S., Xing, D., Call, D. F., and Logan, B. E. (2009). Direct biological conversion of electrical  
387 current into methane by electromethanogenesis. *Environ. Sci. Technol.* 43, 3953–3958.  
388 doi:10.1021/es803531g.

389 Cord-Ruwisch, R., Lovley, D. R., and Schink, B. (1998). Growth of *Geobacter sulfurreducens* with  
390 acetate in syntrophic cooperation with hydrogen-oxidizing anaerobic partners. *Appl. Environ.*  
391 *Microbiol.* 64, 2232–2236. doi:0099-2240/98/\$04.00+0.

392 Cruz Viggi, C., Rossetti, S., Fazi, S., Paiano, P., Majone, M., and Aulenta, F. (2014). Magnetite  
393 Particles Triggering a Faster and More Robust Syntrophic Pathway of Methanogenic Propionate  
394 Degradation. *Environ. Sci. Technol.* 48, 7536–7543. doi:10.1021/es5016789.

395 Dang, Y., Holmes, D. E., Zhao, Z., Woodard, T. L., Zhang, Y., Sun, D., et al. (2016). Enhancing  
396 anaerobic digestion of complex organic waste with carbon-based conductive materials. *Bioresour.*  
397 *Technol.* 220, 516–522. doi:10.1016/j.biortech.2016.08.114.

398 Deutzmann, J. S., Sahin, M., and Spormann, A. M. (2015). Extracellular Enzymes Facilitate Electron  
399 Uptake in Biocorrosion and bioelectrosynthesis. *MBio* 6, 1–8. doi:10.1128/mBio.00496-15.Editor.

400 Falkowski, P. G., Fenchel, T., and Delong, E. F. (2008). The Microbial Engines That Drive Earth 's  
401 Biogeochemical Cycles. *Science* (80-. ). 320, 1034–1039. doi:10.1126/science.1153213.

402 Fu, Q., Kuramochi, Y., Fukushima, N., Maeda, H., Sato, K., and Kobayashi, H. (2015).  
403 Bioelectrochemical analyses of the development of a thermophilic biocathode catalyzing  
404 electromethanogenesis. *Environ. Sci. Technol.* 49, 1225–32. doi:10.1021/es5052233.

405 Ishii, S., Suzuki, S., Tenney, A., Nealson, K. H., and Bretschger, O. (2018). Comparative  
406 metatranscriptomics reveals extracellular electron transfer pathways conferring microbial  
407 adaptivity to surface redox potential changes. *ISME J.* doi:10.1038/s41396-018-0238-2.

408 Jing, Y., Wan, J., Angelidaki, I., Zhang, S., and Luo, G. (2017). iTRAQ quantitative proteomic analysis  
409 reveals the pathways for methanation of propionate facilitated by magnetite. *Water Res.* 108, 212–  
410 221. doi:10.1016/j.watres.2016.10.077.

411 Kral, T. A., Brink, K. M., Miller, S. L., and McKay, C. P. (1998). Hydrogen consumptions by  
412 methanogens on the early earth. *Orig. Life Evol. Biosph.* 28, 311–319. doi:Doi  
413 10.1023/A:1006552412928.

414 Kulkarni, G., Kridelbaugh, D. M., Guss, A. M., and Metcalf, W. W. (2009). Hydrogen is a preferred  
415 intermediate in the energy-conserving electron transport chain of *Methanosarcina barkeri*. *Proc.*  
416 *Natl. Acad. Sci. U. S. A.* 106, 15915–20. doi:10.1073/pnas.0905914106.

417 Kulkarni, G., Mand, T. D., and Metcalf, W. W. (2018). Energy Conservation via Hydrogen Cycling in  
418 the Methanogenic Archaeon *Methanosarcina barkeri*. *MBio* 9, 1–10. doi:10.1128/mBio.01256-18.

419 Lee, J. Y., Lee, S. H., and Park, H. D. (2016). Enrichment of specific electro-active microorganisms  
420 and enhancement of methane production by adding granular activated carbon in anaerobic  
421 reactors. *Bioresour. Technol.* 205, 205–212. doi:10.1016/j.biortech.2016.01.054.

422 Lei, Y., Sun, D., Dang, Y., Chen, H., Zhao, Z., Zhang, Y., et al. (2016). Stimulation of methanogenesis  
423 in anaerobic digesters treating leachate from a municipal solid waste incineration plant with  
424 carbon cloth. *Bioresour. Technol.* 222, 270–276. doi:10.1016/j.biortech.2016.10.007.

425 Levar, C. E., Hoffman, C. L., Dunshee, A. J., Toner, B. M., and Bond, D. R. (2017). Redox potential as  
426 a master variable controlling pathways of metal reduction by *Geobacter sulfurreducens*. *ISME J.*  
427 11, 741–752. doi:10.1038/ismej.2016.146.

428 Li, L., Li, Q., Rohlin, L., Kim, U., Salmon, K., Rejtar, T., et al. (2007). Quantitative Proteomic and  
429 Microarray Analysis of the Archaeon *Methanosarcina Acetivorans* Grown with Acetate Versus  
430 Methanol. *Proteins* 6, 759–771. doi:10.1021/pr060383l.Quantitative.

431 Li, Q., Li, L., Rejtar, T., Lessner, D. J., Karger, B. L., and Ferry, J. G. (2006). Electron Transport in the  
432 Pathway of Acetate Conversion to Methane in the Marine Archaeon *Methanosarcina acetivorans*.  
433 *J. Bacteriol.* 188, 702–710. doi:10.1128/JB.188.2.702–710.2006.

434 Li, Y., Zhang, Y., Yang, Y., Quan, X., and Zhao, Z. (2017). Potentially direct interspecies electron  
435 transfer of methanogenesis for syntrophic metabolism under sulfate reducing conditions with  
436 stainless steel. *Bioresour. Technol.* 234, 303–309. doi:10.1016/j.biortech.2017.03.054.

- 437 Lienemann, M., Deutzmann, J. S., Milton, R. D., Sahin, M., and Spormann, A. M. (2018). Mediator-  
438 free enzymatic electrosynthesis of formate by the *Methanococcus maripaludis* heterodisulfide  
439 reductase supercomplex. *Bioresour. Technol.* 254, 278–283. doi:10.1016/j.biortech.2018.01.036.
- 440 Lin, Q., Fang, X., Ho, A., Li, J., Yan, X., Tu, B., et al. (2017a). Different substrate regimes determine  
441 transcriptional profiles and gene co-expression in *Methanosarcina barkeri* (DSM 800). *Appl.*  
442 *Microbiol. Biotechnol.*, 1–14. doi:10.1007/s00253-017-8457-4.
- 443 Lin, R., Cheng, J., Zhang, J., Zhou, J., Cen, K., and Murphy, J. D. (2017b). Boosting biomethane yield  
444 and production rate with graphene: The potential of direct interspecies electron transfer in  
445 anaerobic digestion. *Bioresour. Technol.* 239, 345–352. doi:10.1016/j.biortech.2017.05.017.
- 446 Liu, F., Rotaru, A.-E., Shrestha, P. M., Malvankar, N. S., Nevin, K. P., and Lovley, D. R. (2012).  
447 Promoting direct interspecies electron transfer with activated carbon. *Energy Environ. Sci.* 5,  
448 8982. doi:10.1039/c2ee22459c.
- 449 Lohner, S. T., Deutzmann, J. S., Logan, B. E., Leigh, J., and Spormann, A. M. (2014). Hydrogenase-  
450 independent uptake and metabolism of electrons by the archaeon *Methanococcus maripaludis*.  
451 *ISME J.* 8, 1673–1681. doi:10.1038/ismej.2014.82.
- 452 Lovley, D. R. (1985). Minimum threshold for hydrogen metabolism in methanogenic bacteria. *Appl.*  
453 *Environ. Microbiol.* 49, 1530–1. Available at: <http://www.ncbi.nlm.nih.gov/pubmed/16346820>  
454 [Accessed October 4, 2016].
- 455 Mand, T. D., Kulkarni, G., and Metcalf, W. W. (2018). Genetic, biochemical, and molecular  
456 characterization of *Methanosarcina barkeri* 2 mutants lacking three distinct classes of

- 457 hydrogenase. *bioRxiv*. doi:10.1101/334656.
- 458 McGlynn, S. E. (2017). Energy Metabolism during Anaerobic Methane Oxidation in ANME Archaea.  
459 *Microbes Environ.* 32, 5–13. doi:10.1264/jsme2.ME16166.
- 460 McGlynn, S. E., Chadwick, G. L., Kempes, C. P., and Orphan, V. J. (2015). Single cell activity reveals  
461 direct electron transfer in methanotrophic consortia. *Nature* 526, 531–535.  
462 doi:10.1038/nature15512.
- 463 Meuer, J., Kuettner, H. C., Zhang, J. K., Hedderich, R., and Metcalf, W. W. (2002). Genetic analysis of  
464 the archaeon *Methanosarcina barkeri* Fusaro reveals a central role for Ech hydrogenase and  
465 ferredoxin in methanogenesis and carbon fixation. *Proc. Natl. Acad. Sci.* 99, 5632–5637.  
466 doi:10.1073/pnas.072615499.
- 467 Rotaru, A.-E., Calabrese, F., Stryhanyuk, H., Musat, F., Shrestha, P. M., Weber, H. S., et al. (2018).  
468 Conductive Particles Enable Syntrophic Acetate Oxidation between *Geobacter* and  
469 *Methanosarcina* from Coastal Sediments. *MBio* 9, 1–14. doi:10.1128/mBio.00226-18.
- 470 Rotaru, A.-E., Shrestha, P. M., Liu, F., Markovaite, B., Chen, S., Nevin, K. P., et al. (2014a). Direct  
471 Interspecies Electron Transfer between *Geobacter metallireducens* and *Methanosarcina barkeri*.  
472 *Appl. Environ. Microbiol.* 80, 4599–4605. doi:10.1128/AEM.00895-14.
- 473 Rotaru, A.-E., Shrestha, P. M., Liu, F., Shrestha, M., Shrestha, D., Embree, M., et al. (2014b). A new  
474 model for electron flow during anaerobic digestion: direct interspecies electron transfer to  
475 *Methanosaeta* for the reduction of carbon dioxide to methane. *Energy Environ. Sci.* 7, 408–415.  
476 doi:10.1039/C3EE42189A.

477 Rotaru, A.-E., Woodard, T. L., Nevin, K. P., and Lovley, D. R. (2015). Link between capacity for  
478 current production and syntrophic growth in *Geobacter* species. *Front. Microbiol.* 6, 1–8.  
479 doi:10.3389/fmicb.2015.00744.

480 Salvador, A. F., Martins, G., Melle-Franco, M., Serpa, R., Stams, A. J. M., Cavaleiro, A. J., et al.  
481 (2017). Carbon nanotubes accelerate methane production in pure cultures of methanogens and in a  
482 syntrophic coculture. *Environ. Microbiol.* 19, 2727–2739. doi:10.1111/1462-2920.13774.

483 Schlegel, K., Welte, C., Deppenmeier, U., and Müller, V. (2012). Electron transport during aceticlastic  
484 methanogenesis by *Methanosarcina acetivorans* involves a sodium-translocating Rnf complex.  
485 *FEBS J.* 279, 4444–4452. doi:10.1111/febs.12031.

486 Seiler, M., Mehrle, A., Poustka, A., and Wiemann, S. (2006). The 3of5 web application for complex  
487 and comprehensive pattern matching in protein sequences. *BMC Bioinformatics* 7, 1–12.  
488 doi:10.1186/1471-2105-7-144.

489 Shimizu, S., Upadhye, R., Ishijima, Y., and Naganuma, T. (2010). *Methanosarcina horonobensis* sp.  
490 nov., a methanogenic archaeon isolated from a deep subsurface Miocene formation. *Int. J. Syst.*  
491 *Evol. Microbiol.* 61, 2503–2507. doi:10.1099/ijs.0.028548-0.

492 Shrestha, P. M., Rotaru, A.-E., Aklujkar, M., Liu, F., Shrestha, M., Summers, Z. M., et al. (2013).  
493 Syntrophic growth with direct interspecies electron transfer as the primary mechanism for energy  
494 exchange. *Environ. Microbiol. Rep.* 5, 904–910. doi:10.1111/1758-2229.12093.

495 Smith, T. J., and Stevenson, K. J. (2007). ‘Reference electrodes’, in *Handbook of Electrochemistry*  
496 (Elsevier B.V.), 73–110. doi:10.1016/B978-0-444-51958-0.50005-7.



- 497 Suharti, S., Wang, M., De Vries, S., and Ferry, J. G. (2014). Characterization of the RnfB and RnfG  
498 subunits of the Rnf complex from the archaeon *Methanosarcina acetivorans*. *PLoS One* 9, 1–10.  
499 doi:10.1371/journal.pone.0097966.
- 500 Thauer, R. K., Kaster, A.-K., Goenrich, M., Schick, M., Hiromoto, T., and Shima, S. (2010).  
501 Hydrogenases from Methanogenic Archaea, Nickel, a Novel Cofactor, and H<sub>2</sub> Storage. *Annu.*  
502 *Rev. Biochem.* 79, 507–536. doi:10.1146/annurev.biochem.030508.152103.
- 503 Thauer, R. K., Kaster, A.-K., Seedorf, H., Buckel, W., and Hedderich, R. (2008). Methanogenic  
504 archaea: ecologically relevant differences in energy conservation. *Nat. Rev. Microbiol.* 6, 579–  
505 591. doi:10.1038/nrmicro1931.
- 506 Timmers, P. H. A., Welte, C. U., Koehorst, J. J., Plugge, C. M., Jetten, M. S. M., and Stams, A. J. M.  
507 (2017). Reverse Methanogenesis and Respiration in Methanotrophic Archaea. *Archaea* 2017.  
508 doi:10.1155/2017/1654237.
- 509 Wang, F. P., Zhang, Y., Chen, Y., He, Y., Qi, J., Hinrichs, K.-U., et al. (2014). Methanotrophic archaea  
510 possessing diverging methane-oxidizing and electron-Transporting pathways. *ISME J.* 8, 1069–  
511 1078. doi:10.1038/ismej.2013.212.
- 512 Wang, M., Tomb, J.-F., and Ferry, J. G. (2011). Electron transport in acetate-grown *Methanosarcina*  
513 *acetivorans*. *BMC Microbiol.* doi:10.1186/1471-2180-11-165.
- 514 Wang, O., Zheng, S., Wang, B., Wang, W., and Liu, F. (2018). Necessity of electrically conductive pili  
515 for methanogenesis with magnetite stimulation. *PeerJ* 6, e4541. doi:10.7717/peerj.4541.

- 516 Ye, Q., Zhang, Z., Huang, Y., Fang, T., Cui, Q., He, C., et al. (2018). Enhancing electron transfer by  
517 magnetite during phenanthrene anaerobic methanogenic degradation. *Int. Biodeterior. Biodegrad.*,  
518 0–1. doi:10.1016/j.ibiod.2018.01.012.
- 519 Zhang, S., Chang, J., Lin, C., Pan, Y., Cui, K., Zhang, X., et al. (2017). Enhancement of  
520 methanogenesis via direct interspecies electron transfer between Geobacteraceae and  
521 Methanosaetaceae conducted by granular activated carbon. *Bioresour. Technol.* 245, 132–137.  
522 doi:10.1016/j.biortech.2017.08.111.
- 523 Zhao, Z., Zhang, Y., Li, Y., Dang, Y., Zhu, T., and Quan, X. (2017). Potentially shifting from  
524 interspecies hydrogen transfer to direct interspecies electron transfer for syntrophic metabolism to  
525 resist acidic impact with conductive carbon cloth. *Chem. Eng. J.* 313, 10–18.  
526 doi:10.1016/j.cej.2016.11.149.
- 527 Zheng, S., Zhang, H., Li, Y., Zhang, H., Wang, O., Zhang, J., et al. (2015). Co-occurrence of  
528 Methanosarcina mazei and Geobacteraceae in an iron (III)-reducing enrichment culture. *Front.*  
529 *Microbiol.* 6, 1–12. doi:10.3389/fmicb.2015.00941.
- 530 Zhuang, L., Tang, J., Wang, Y., Hu, M., and Zhou, S. (2015). Conductive iron oxide minerals  
531 accelerate syntrophic cooperation in methanogenic benzoate degradation. *J. Hazard. Mater.* 293,  
532 37–45. doi:10.1016/j.jhazmat.2015.03.039.

533

534

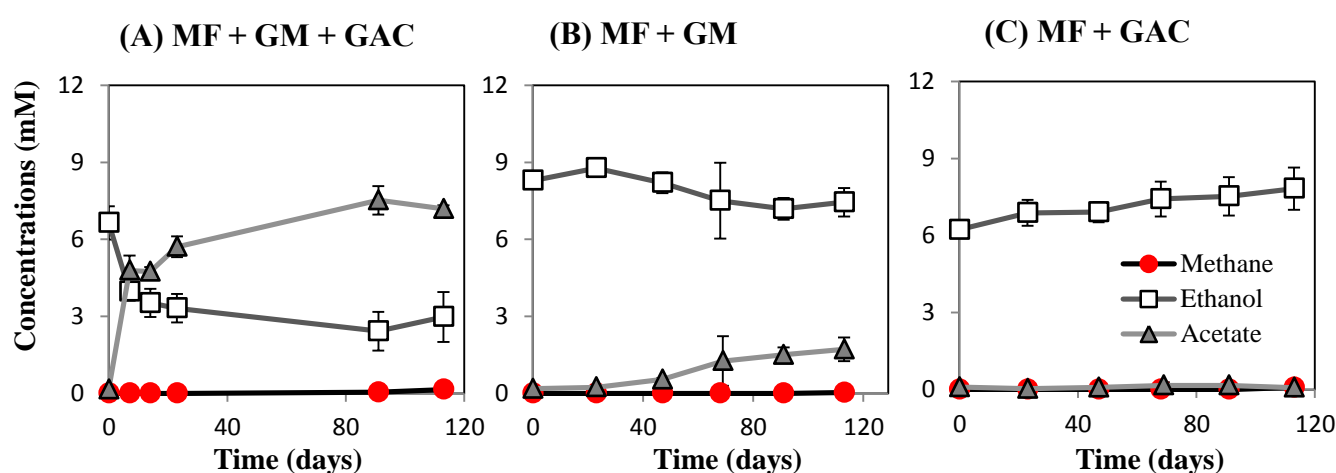

**(Fig. 1)** Co-cultures of *M. formicicum* with *G. metallireducens* feeding on ethanol with or without GAC. Error bars are based on standard deviation (n=3). MF; *Methanobacterium formicicum*, GM; *Geobacter metallireducens*, GAC; granular activated carbon, Circles; Methane, Squares; Ethanol, Triangles; Acetate .

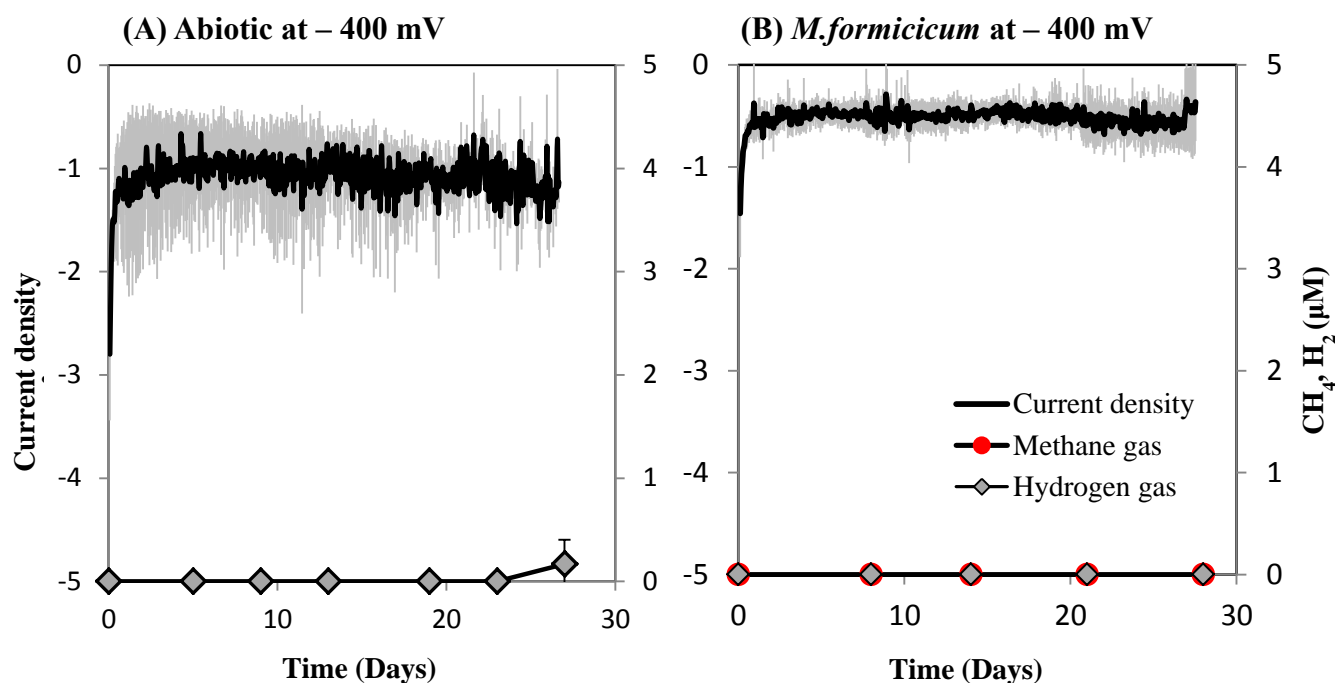

**(Fig. 2)** Current consumption and gas production from (A) abiotic and (B) *M. formicicum* reactors at -400 mV (vs. SHE). Only the excess values of gases compared to that of the open circuit control are plotted here. Error bars are based on standard deviation (n=2 for abiotic, n=3 for *M. formicicum* reactors).

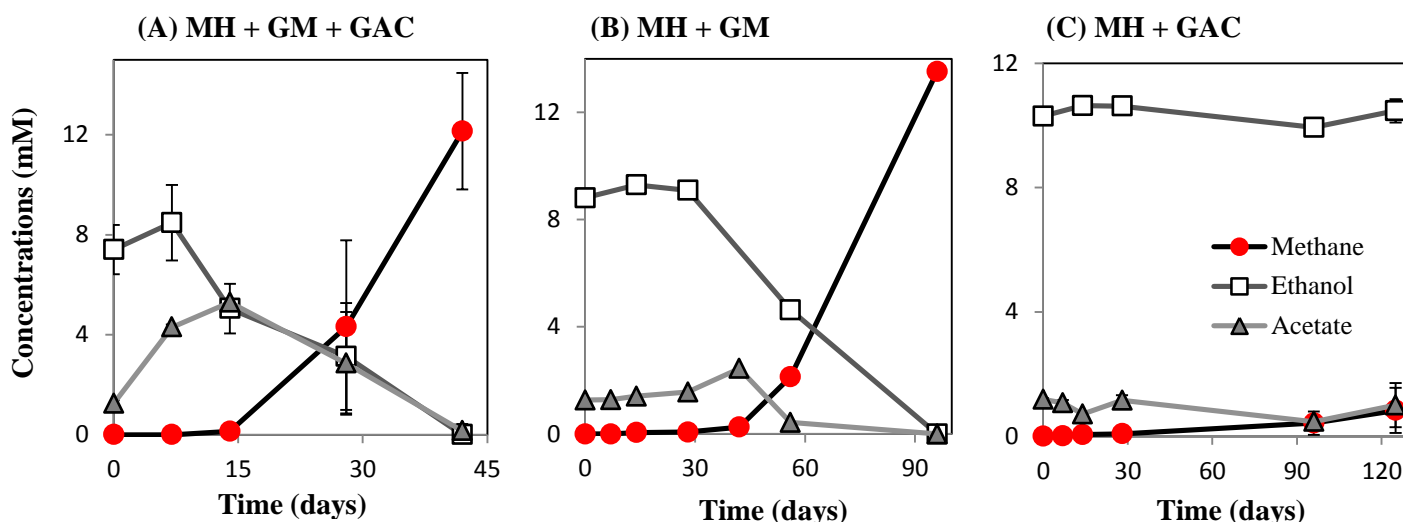

**(Fig. 3)** Co-cultures of *M. horonobensis* with *G. metallireducens* feeding on ethanol with or without GAC. MH; *Methanosarcina horonobensis*, GM; *Geobacter metallireducens*, GAC; granular activated carbon, Circles; Methane, Squares; Ethanol, Triangles; Acetate. The results are from triplicate samples except for (B) which is a representative sample for which the rest of the replicate data is presented in Fig S4.

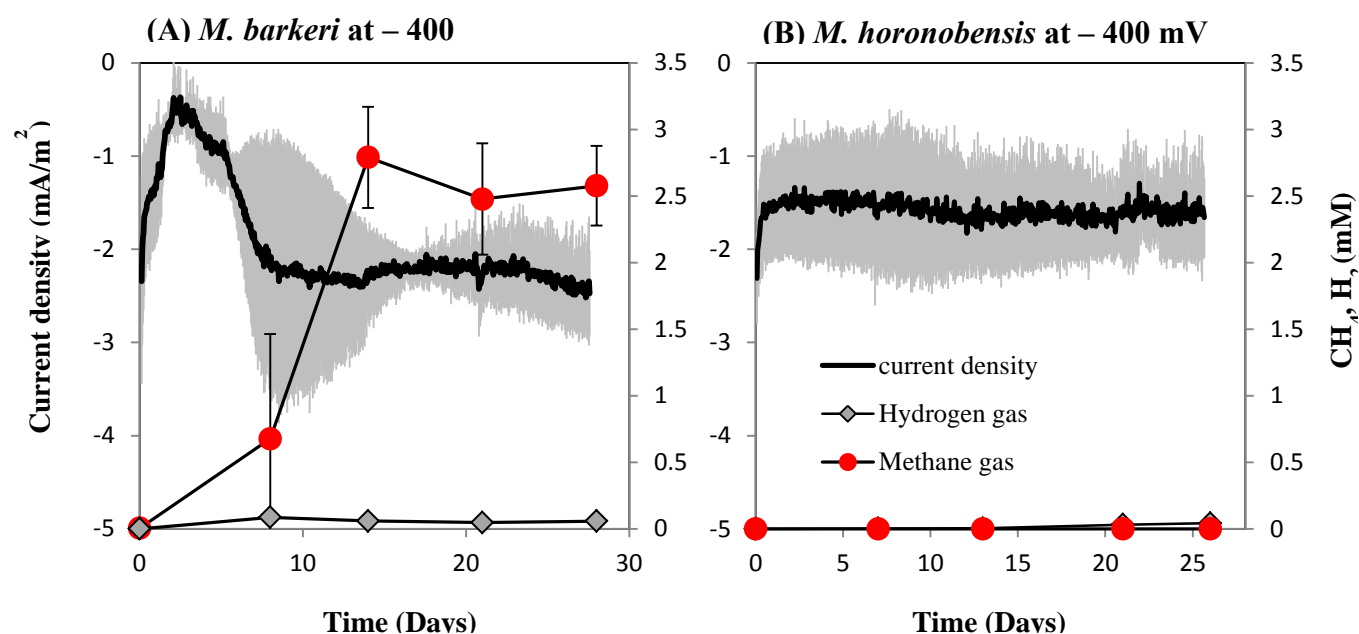

**(Fig. 4)** Current consumption and gas production from (A) *M. barkeri* reactors and (B) *M. horonobensis* at -400 mV (vs. SHE). Only the excess values of gases compared to that of the open circuit control are plotted here. Error bars are based on standard deviation (n=3).

602 **Table 1.** Phenotypic differences between the methanogens tested during this study

| Species                                        | Max. DIET<br>methanogenesis rate                              | Max. MIET<br>methanogenesis rate                              | Max.<br>Electromethanogenesis<br>at – 400 mV (vs. SHE) | Growth<br>on H <sub>2</sub> | Morphology                                                    |
|------------------------------------------------|---------------------------------------------------------------|---------------------------------------------------------------|--------------------------------------------------------|-----------------------------|---------------------------------------------------------------|
| <i>Methanosarcina<br/>barkeri</i> MS           | 0.2 ± 0.06 mM/day CH <sub>4</sub><br>(lag-phase ca. 42 days)  | 0.98 ± 0.15 mM/day CH <sub>4</sub><br>(lag-phase ca. 7 days)  | 0.17 ± 0.03 mM/day CH <sub>4</sub>                     | Yes                         | Cocci aggregated into<br>rosettes (Bryant and<br>Boone, 1987) |
| <i>Methanosarcina<br/>huronobensis</i> HB-1    | 0.29 ± 0.04 mM/day CH <sub>4</sub><br>(lag-phase ca. 42 days) | 0.64 ± 0.24 mM/day CH <sub>4</sub><br>(lag-phase ca. 14 days) | No                                                     | No                          | Single irregular cocci<br>(Shimizu et al., 2010)              |
| <i>Methanobacterium<br/>formicicum</i> DSM1535 | No                                                            | No                                                            | No                                                     | Yes                         | Rods (Ferry, 1993)                                            |

603

604

605

606

607

608 **(Table. 2)** Genomic comparison of three methanogens based on TIGR family protein categories

| TIGRfam Categories                                         | No. of genes associated within a TIGR family |                               |                                    |
|------------------------------------------------------------|----------------------------------------------|-------------------------------|------------------------------------|
|                                                            | <i>Methanosarcina horonobensis</i>           | <i>Methanosarcina barkeri</i> | <i>Methanobacterium formicicum</i> |
| Fatty acid and phospholipid metabolism                     | 3                                            | 4                             | 3                                  |
| Transcription                                              | 13                                           | 12                            | 13                                 |
| Central intermediary metabolism                            | 21                                           | 27                            | 21                                 |
| Cell processes                                             | 26                                           | 18                            | 22                                 |
| Cell envelope                                              | 28                                           | 27                            | 14                                 |
| Purines, pyrimidines, nucleosides, and nucleotides         | 33                                           | 33                            | 33                                 |
| Mobile and extrachromosomal element functions              | 39                                           | 2                             | 2                                  |
| DNA metabolism                                             | 43                                           | 38                            | 27                                 |
| Protein fate                                               | 48                                           | 44                            | 33                                 |
| Amino acid biosynthesis                                    | 56                                           | 57                            | 57                                 |
| Biosynthesis of cofactors, prosthetic groups, and carriers | 60                                           | 61                            | 65                                 |
| Regulatory functions                                       | 84                                           | 33                            | 51                                 |
| Protein synthesis                                          | 87                                           | 89                            | 75                                 |
| Energy metabolism                                          | 95                                           | 86                            | 68                                 |
| Transport and binding proteins                             | 97                                           | 85                            | 63                                 |
| Unknown and hypothetical                                   | 119                                          | 78                            | 92                                 |

609

610



611 **Table 3.** Relevant genotypic differences between the methanogens tested during this study

| Species                                    | Energy conservation   | S-layer proteins | Sum of electron transfer proteins | Predicted c-type cytochromes (CxxCH motif proteins) | Other cytochromes | Predicted Ferredoxins | Predicted thioredoxins |
|--------------------------------------------|-----------------------|------------------|-----------------------------------|-----------------------------------------------------|-------------------|-----------------------|------------------------|
| <i>Methanosarcina barkeri</i> MS           | Ech-hydrogenase       | 8                | 37                                | 20 (0/1 multiheme*)                                 | 3 (cyt b)         | 4                     | 10                     |
| <i>Methanosarcina horonobensis</i> HB-1    | Rnf-complex           | 9                | 47                                | 30 (3 multiheme)                                    | 3 (cyt b)         | 6                     | 8                      |
| <i>Methanobacterium formicicum</i> DSM1535 | EhaA/EhbA hydrogenase | None             | 23                                | 16 (None)                                           | None              | 4                     | 2                      |

612 \*The predicted multiheme cytochrome in *M. barkeri* strain MS had one standard CxxCH and one CxCH motif.

613

614
