# 1 Extracellular Electron Uptake by Two *Methanosarcina* Species

## 2 Authors:

3 Mon Oo Yee<sup>1</sup>, Oona Snoeyenbos-West<sup>1,2,a</sup>, Bo Thamdrup<sup>1</sup>, Lars DM Ottosen<sup>2</sup>, Amelia-Elena Rotaru<sup>1\*</sup>

4 <sup>1</sup> Nordcee, Department of Biology, University of Southern Denmark, Odense, Denmark

5 <sup>2</sup> Department of Engineering, University of Aarhus, Aarhus, Denmark

6 <sup>a</sup> (Current address) Department of Microbiology & Molecular Genetics, Michigan State University, East  
7 Lansing, USA

8 \*Correspondence to: [arotaru@biology.sdu.dk](mailto:arotaru@biology.sdu.dk)

## 9 Abstract

10 Direct electron uptake by prokaryotes is a recently described mechanism with a potential application for  
11 energy and CO<sub>2</sub> storage into value added chemicals. Members of Methanosarcinales, an  
12 environmentally and biotechnologically relevant group of methanogens, were previously shown to  
13 retrieve electrons from an extracellular electrogenic partner performing Direct Interspecies Electron  
14 Transfer (DIET) and were therefore proposed to be electroactive. However, their intrinsic  
15 electroactivity has never been examined. In this study, we tested two methanogens belonging to the  
16 genus *Methanosarcina*, *M. barkeri* and *M. horonobensis*, regarding their ability to accept electrons  
17 directly from insoluble electron donors like other cells, conductive particles and electrodes. Both  
18 methanogens were able to retrieve electrons from *Geobacter metallireducens* via DIET. Furthermore,  
19 DIET was also stimulated upon addition of electrically conductive granular activated carbon (GAC)  
20 when each was co-cultured with *G. metallireducens*. However, when provided with a cathode poised at  
21 -400 mV (vs. SHE), only *M. barkeri* could perform electromethanogenesis. In contrast, the strict  
22 hydrogenotrophic methanogen, *Methanobacterium formicicum*, did not produce methane regardless of  
23 the type of insoluble electron donor provided (*Geobacter* cells, GAC or electrodes). A comparison of  
24 functional gene categories between the two *Methanosarcina* showed differences regarding energy

25 metabolism, which could explain dissimilarities concerning electromethanogenesis at fixed potentials.  
26 We suggest that these dissimilarities are minimized in the presence of an electrogenic DIET partner  
27 (e.g. *Geobacter*), which can modulate its surface redox potentials by adjusting the expression of  
28 electroactive surface proteins.

## 29 **Introduction**

30 Extracellular electron uptake by methanogens may impact carbon turnover in electron-acceptor limited  
31 environments (Morris et al., 2013). In these environments, thermodynamically challenging processes  
32 become possible due to syntrophic interactions between bacteria and archaea. A syntrophic interaction  
33 requires a bacterium, which oxidizes organics to interspecies-transferable molecules. Moreover,  
34 syntrophy requires a partner methanogen to scavenge the transferable molecules. For decades, we have  
35 assumed that interspecies-transferable molecules were either H<sub>2</sub> or formate (Stams and Plugge, 2009).  
36 We now know that some species can also transfer electrons directly (Lovley, 2017). During direct  
37 interspecies electron transfer (DIET), species like *Geobacter* oxidize ethanol according to reaction (1),  
38 only in the presence of methanogens like *Methanosarcina*, which scavenge reducing equivalents (H<sup>+</sup>  
39 and e<sup>-</sup>) and acetate (Rotaru et al., 2014a, 2014b) (**Fig. 1**).

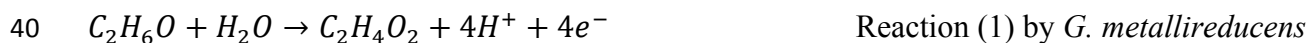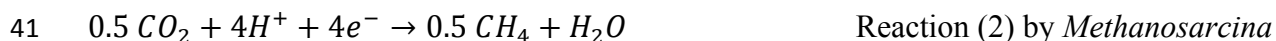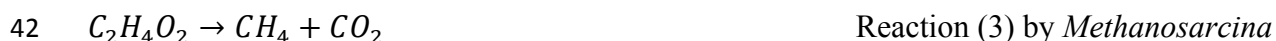

43 In DIET co-cultures, only those *Geobacter* species producing high current densities, met the energetic  
44 needs of their DIET partners (Rotaru et al., 2015). For this purpose, *Geobacter* up-regulates the  
45 expression of redox active and conductive proteins (outer membrane *c*-type cytochromes and pili)  
46 (Holmes et al., 2018b; Shrestha et al., 2013). *Geobacter*'s requirement for outer-surface proteins during  
47 DIET was confirmed earlier with gene-deletion studies (Rotaru et al., 2014a, 2014b). Thus, if  
48 *Geobacter* lacked the ability to produce e.g. pili it was incapable of DIET.

49 Although we understand how *Geobacter* releases electrons outside their cells during DIET, the way  
50 *Methanosarcinales* retrieve DIET-electrons is poorly understood. A glimpse at this mechanism was

51 provided in a recent comparative transcriptomic study (Holmes et al., 2018b). In this study, the  
52 transcriptomes of DIET co-cultures (*G. metallireducens* – *Methanosarcina barkeri*) were compared to  
53 those of co-cultures performing interspecies H<sub>2</sub>-transfer (*Pelobacter carbinolicus* – *M. barkeri*). During  
54 DIET, *M. barkeri* had higher expression of membrane-bound redox-active proteins like cupredoxins,  
55 thioredoxins, pyrroloquinoline, and quinone-, cytochrome- or Fe-S containing proteins (Holmes et al.,  
56 2018b). Still, the exact mechanism of electron uptake by *Methanosarcina* has not been validated and  
57 warrants further investigation.

58 Moreover, *Methanosarcina* can also retrieve electrons from electrically conductive particles charged by  
59 *Geobacter* oxidizing organics (Shrestha and Rotaru, 2014). In effect, DIET is accelerated by electrically  
60 conductive particles/minerals perhaps because they replace conductive and redox active surface proteins  
61 diminishing cellular energy expenditure required to overexpress such surface constituents (Liu et al.,  
62 2012). For instance, co-cultures of *G. metallireducens* and *M. barkeri* were stimulated at the addition of  
63 conductive particles, such as GAC (Liu et al., 2012), carbon cloth (Chen et al., 2014a), biochar (Chen et  
64 al., 2014b), or magnetite (Wang et al., 2018). On the other hand, the addition of non-conductive  
65 materials did not stimulate DIET (Chen et al., 2014a; Rotaru et al., 2018a). In addition, conductive  
66 particles appear to play a significant role in interspecies interactions from natural and artificial  
67 ecosystems such as sediments, soils, rice paddies or anaerobic digesters (Holmes et al., 2017a; Rotaru et  
68 al., 2018b; Ye et al., 2018; Zhang et al., 2018). In these cases, the addition of conductive particles  
69 enriched for DIET-related Methanosarcinales (Dang et al., 2016; Holmes et al., 2017b; Rotaru et al.,  
70 2018a; Zheng et al., 2015). However, exceptions were observed since occasionally conductive particles  
71 enriched for H<sub>2</sub>-utilizing methanogens of the genus *Methanospirillum* (Lee et al., 2016) or  
72 *Methanobacterium* (Lin et al., 2017; Zhuang et al., 2015).

73 Since methanogens retrieve extracellular electrons from cells or conductive particles to reduce CO<sub>2</sub> to  
74 methane, it was expected that they could also retrieve electrons from a poised electrode via  
75 electromethanogenesis. Nevertheless, electromethanogenesis was only verified with H<sub>2</sub>-utilizing  
76 methanogens like *Methanobacterium palustre* (Cheng et al., 2009). Yet, H<sub>2</sub>-utilizers were incapable of  
77 DIET (Rotaru et al., 2014b). Conversely, it is unknown if Methanosarcinales, which are capable of  
78 DIET, are also capable of electron uptake from a cathode. Our objective was to investigate the ability to  
79 carry electromethanogenesis and DIET in two *Methanosarcina* species. We have shown that both

80 *Methanosarcina* species grew by DIET, however only *M. barkeri* grew on the cathode at - 400 mV vs.  
81 SHE. This indicates that extracellular electron-uptake routes from cathodes or other cells might differ  
82 between *Methanosarcina* species.

83

## 84 **Materials and Methods**

### 85 **Microorganism strains and cultivation conditions**

86 *Methanosarcina barkeri* MS (DSM 800) and *Methanosarcina horonobensis* HB-1 (DSM 21571) were  
87 purchased from the German culture collection DSMZ while *Methanobacterium formicicum* (NBRC  
88 100475) was from the Japanese culture collection NBRC. *Geobacter metallireducens* GS-15 was sent to  
89 us by Dr. Sabrina Beckmann from the University of New South Wales, Australia.

90 Routine cultivation was performed under strictly anaerobic conditions in serum bottles sealed with butyl  
91 rubber stoppers and incubated statically at 37°C. All the microorganisms had been adapted to grow in  
92 DSMZ medium 120c with the following modifications: 1 g/L NaCl, 0.5g/L yeast, and no tryptone  
93 (Rotaru et al., 2014a). During incubations in co-cultures or for electrochemical experiments, sulfide and  
94 yeast extract was omitted. When grown in pure cultures, *Methanosarcina* species were provided with 30  
95 mM acetate and 20 mM methanol as methanogenic substrates, while *M. formicicum* was provided with  
96 150 kPa of H<sub>2</sub>: CO<sub>2</sub> (80:20) in the headspace. *G. metallireducens* was routinely grown with 20 mM  
97 ethanol and 56 mM ferric citrate. All media and cultures were prepared and kept under an N<sub>2</sub>: CO<sub>2</sub>  
98 (80:20) atmosphere.

99 The co-cultures of *Geobacter* and methanogens were initiated with 0.5 mL of *G. metallireducens* and 1  
100 mL of acetate-grown *Methanosarcina*-species or H<sub>2</sub>-grown *M. formicicum* inoculated into 8.5 ml of the  
101 media prepared as above. The starting cell numbers for the methanogens in co-cultures were  
102 approximately 2.6 x 10<sup>6</sup> cells/mL, 8.2 x 10<sup>6</sup> cells/mL and 6.7 x 10<sup>5</sup> cells/mL for *M. barkeri*, *M.*  
103 *formicicum* and *M. horonobensis*, respectively. The starting cell numbers for *G. metallireducens* in co-  
104 cultures were circa 1.5 x 10<sup>5</sup>. Incubations were carried out in 20 ml pressure vials. For the co-cultures  
105 ethanol (10 mM) was added as an electron donor and CO<sub>2</sub> was the sole electron acceptor. When noted,

106 sterile granular activated carbon (GAC) was added at a concentration of 25 g/L and prepared as  
107 described before (Rotaru et al., 2018a).

## 108 **Electrochemical setup and measurements**

109 All bioelectrochemical incubations were carried with a modified DSMZ 120c medium (see above) in  
110 the absence of sulfide and yeast extract. The pH of this medium in the bioelectrochemical reactors was  
111 set to 6.5. We used bioelectrochemical reactors with a standard dual chamber configuration as shown in  
112 **Figure S1**. Two-chamber glass bottles were purchased from Adams & Chittenden Scientific Glass  
113 (USA) with side ports fitted with butyl septa to allow for medium transfer, sampling, and the  
114 introduction of a reference electrode. Each chamber of the reactors had a total volume of 650 ml with a  
115 flange diameter of 40 mm and the chambers were separated by a Nafion™ N117 proton exchange  
116 membrane (Ion Power) held by an O-ring seal with a knuckle clamp.

117 Both the working and counter electrodes were made of graphite (Mersen MI Corp., Greenville USA)  
118 with dimensions of 2.5 cm x 7.5 cm x 1.2 cm thus a total projected surface area of 61.5 cm<sup>2</sup>. The  
119 working and counter electrodes were coupled to titanium wires, which pierced through rubber stoppers  
120 fitted into the main opening of each chamber. A 2 cm deep and 2 mm wide hole was drilled on the short  
121 side of the electrode and a 12.5 cm long; 2 mm wide titanium rod (Alfa-Aesar, DE) was inserted and  
122 sealed from the outside with biocompatible non-conductive epoxy. Electrodes with a resistance of less  
123 than 10 Ω were used to ensure proper electrical connections. The assembled electrodes were introduced  
124 into the chamber via the main opening and 2 mm-wide holes were drilled in the black rubber stopper to  
125 allow access of the titanium rod. After autoclaving the reactors, sterile medium was transferred into the  
126 reactors anaerobically and aseptically. Sterile (bleach and ethanol series) reference electrodes were  
127 lodged through a side port in the working electrode chamber at a distance of about 1 cm from the  
128 surface of the working electrode. After lodging the electrodes, degassing with N<sub>2</sub>: CO<sub>2</sub> (80:20) for circa  
129 30 minutes in each reactor chamber ensured anaerobic conditions. When the pre-cultures were in mid-  
130 exponential phase, they were inoculated (20%) into fresh medium in the cathodic chamber following  
131 sterile anoxic techniques to a final volume of 550 ml leaving a headspace of approximately 100 mL in  
132 each chamber. The approximate cell numbers at the time of inoculation into the electrochemical  
133 reactors for *M. barkeri*, *M. formicicum* and *M. horonobensis* were 2.6 x 10<sup>7</sup> cells/mL, 8.2 x 10<sup>7</sup> cells/mL

134 and  $6.7 \times 10^6$  cells/mL respectively. Cell counts were done with microscopic examination using DAPI  
135 (1  $\mu\text{g/mL}$ ) stained cells.

136 The reference electrodes used were leak-free Ag/AgCl reference electrodes (3.4M KCl) (CMA  
137 Microdialysis, Sweden), which are 242 mV above the standard hydrogen electrode (SHE) according to  
138 the manufacturer and our own measurements against a Hydroflex<sup>®</sup> reference electrode used as NHE  
139 (normal hydrogen electrode). The difference between NHE and SHE is experimentally negligible  
140 (Smith and Stevenson, 2007). All potentials in this paper from here onwards are reported vs. SHE by  
141 adjusting accordingly from the Ag/AgCl reference electrodes values. Cathode poisoning and  
142 electrochemical measurements were carried with a multichannel potentiostat (MultiEmstat, Palmsens,  
143 NL) operated by the Multitrace software (Palmsens, NL).

#### 144 **Analytical measurements and calculations**

145 Headspace samples for CH<sub>4</sub> and H<sub>2</sub> analysis were taken with hypodermic needles and kept in airtight  
146 exetainers until measurement. Methane (CH<sub>4</sub>) and hydrogen gas (H<sub>2</sub>) were measured on a Trace 1300  
147 gas chromatograph (Thermo-Scientific) with a TracePLOT<sup>™</sup> TG-BOND Msieve 5A column and a  
148 thermal conductivity detector (TCD). The carrier gas was argon at a flow rate of 25 mL/min. The  
149 injector, oven and detector temperatures were 150°C, 70°C, and 200°C respectively. The detection limit  
150 for CH<sub>4</sub> and H<sub>2</sub> was ca. 5  $\mu\text{M}$  for both. The concentration unit was converted to molarity by using the  
151 ideal gas law ( $p \times V = n \times R \times T$ ) under standard conditions, where  $p = 1 \text{ atm}$ ,  $V$  is the volume of the  
152 gaseous phase (L),  $n$  is amount of gas (mol),  $R$  is the gas constant ( $0.08205 \text{ atm} \times \text{L} / \text{mol} \times \text{K}$ ) and  $T =$   
153 298.15 K. For ethanol detection, 0.5 mL samples were filtered (0.2  $\mu\text{m}$  pore size) into appropriate  
154 sampling vials and were heated for 5 min. at 60°C. The headspace gas was then pass through the Trace  
155 1300 gas chromatograph (Thermo-Scientific) with a TRACE<sup>™</sup> TR-Wax column and detected by a  
156 flame ionization detector (FID). Nitrogen gas at a flow of 1 mL/min was used as the carrier and the  
157 injector, oven, and detectors were kept at 220°C, 40°C and 230°C respectively. Short-chained volatile  
158 fatty acids (VFA) were analyzed with a Dionex<sup>™</sup> ICS-1500 Ion Chromatography system, using a  
159 Dionex<sup>™</sup> IonPac<sup>™</sup> AS22 IC Column and a mixture of 1.4 mM NaHCO<sub>3</sub> and 4.5 mM Na<sub>2</sub>CO<sub>3</sub> as the  
160 eluent fitted with an electron capture detector (ECD) at 30 mA.

161

## 162 **Genome comparison**

163 Genomes for all tested microorganisms were available at the JGI integrated microbial genomes and  
164 microbiomes. Functional category comparisons and pairwise average nucleotide identity (ANI) were  
165 determined using the IMG/M- “Compare Genomes” tools. The IMG genome IDs of the studied *M.*  
166 *barkeri*, *M. horonobensis* and *M. formicicum* used were 2630968729, 2627854269 and 2645727909  
167 respectively. The gene functions were analyzed from the annotated names of all the protein-coding  
168 genes retrieved from the National Center for Biotechnology Information (NCBI) database. The  
169 accession numbers used were NZ\_CP009528, NZ\_CP009516, and NZ\_LN515531 for *M. barkeri*, *M.*  
170 *horonobensis* and *M. formicicum* respectively. To scan for the cytochrome motif (CxxCH) through all  
171 the genomes, we used a pattern-matching Web-application (Seiler et al., 2006) in addition to manual  
172 search

## 173 **Results and Discussion**

174 It was previously shown that two Methanosarcinales-methanogens, *Methanosarcina barkeri* and  
175 *Methanotherix harundinacea* grew via DIET whereas strict H<sub>2</sub>-utilizing methanogens did not (Rotaru et  
176 al., 2014a, 2014b). Here we show that indeed *M. barkeri* could retrieve electrons not only from an  
177 exoelectrogen but also from an electrode poised at - 400 mV (non-H<sub>2</sub> generating conditions) to carry  
178 electromethanogenesis. As expected, the H<sub>2</sub>-utilizing methanogen *M. formicicum* did not carry  
179 electromethanogenesis under this condition. We tested an environmentally relevant *Methanosarcina*, *M.*  
180 *horonobensis* for extracellular electron uptake from cells and electrodes, and we observed that it could  
181 only retrieve electrons from exoelectrogenic *Geobacter* and from granular activated carbon but not from  
182 electrodes.

### 183 ***Methanosarcina barkeri***

184 *M. barkeri* grows in co-culture with *G. metallireducens* via DIET, and the interaction could be  
185 accelerated by electrically conductive particles (Rotaru et al., 2014a, **Fig. S2**). This was anticipated  
186 because *G. metallireducens*, a respiratory organism, is incapable of substrate fermentation and  
187 consequent H<sub>2</sub> production according to previous physiological tests (Cord-Ruwisch et al., 1998) and  
188 genetic investigations (Aklujkar et al., 2009). Since H<sub>2</sub> could not be generated by *G. metallireducens*, a  
189 strict H<sub>2</sub>-utilizer like *M. formicicum* was rendered incapable of an interspecies association based on H<sub>2</sub>-

190 transfer with this bacterium (Rotaru 2014b). However, more recent studies indicated that conductive  
191 carbon nanotubes stimulated methanogenesis by *M. formicicum* (Salvador et al., 2017). This implied  
192 that *M. formicicum* might be encouraged by the presence of conductive particle to interact  
193 syntrophically with *Geobacter*. Therefore, we tested if conductive GAC aids *M. formicicum* to establish  
194 a syntrophic association with *G. metallireducens*. This was not the case since co-cultures of *M.*  
195 *formicicum* and *G. metallireducens* did not generate methane regardless of the presence or absence of  
196 conductive particles, over the course of 120 days (**Fig. 2**).

197 During DIET, the extracellular electron transfer machinery of *G. metallireducens* plays a crucial role in  
198 *Geobacter-Methanosarcina* interactions, indicating that *Geobacter* releases extracellular electrons for  
199 the methanogen to use. Therefore, we suspected that *Methanosarcina* might also be able to directly  
200 retrieve extracellular electrons from electrodes to do electromethanogenesis.

201 In this study, we tested for the first time if *M. barkeri* could retrieve electrons directly from an electrode  
202 poised at  $-400$  mV. Indeed, *M. barkeri* produced significantly more methane ( $4.4 \pm 0.33$  mM;  $p < 0.001$ )  
203 (**Fig. 3**) when provided with an applied potential at the cathode, in contrast to open circuit controls  
204 without an applied potential ( $1.3 \pm 0.33$  mM) (**Fig. S3**). The background methane in control reactors  
205 resulted from carry-over substrates, once this was subtracted, the additional methane produced by *M.*  
206 *barkeri* in poised reactors ( $3.1 \pm 0.34$  mM) could be solely credited to electricity. Moreover, the highest  
207 rate of methane production was observed when current density profiles indicated the highest current  
208 draw by *M. barkeri* (Fig. 3).

209 There are two possible scenarios for *M. barkeri* growing successfully at a cathode poised at  $-400$  mV:

- 210 1. It may use low concentrations of  $H_2$  generated electrochemically at the cathode, or
- 211 2. It retrieves electrons directly via an unknown mechanism

212 To determine abiotic electrochemical  $H_2$  evolution we i) verified for  $H_2$  accumulation over a month of  
213 incubation and ii) verified the threshold for  $H_2$ -evolution by linear sweep voltammetry at the beginning  
214 and the end of the incubation.  $H_2$  did not accumulate over a month of incubation in six independent  
215 abiotic controls (**Fig. 4A**). Linear sweep voltammetry profiles indicated that in our media the threshold  
216 for  $H_2$ -evolution was below  $-700$  mV (**Fig. 4B**). This was in agreement with previous studies



217 determining electrochemical H<sub>2</sub>-evolution under physiological conditions on a graphite electrode, which  
218 was below -400 mV due to high overpotentials (Batlle-Vilanova et al., 2014; Beese-Vasbender et al.,  
219 2015; Cheng et al., 2009; Mitov et al., 2012).

220 On the other hand, in reactors inoculated with *M. barkeri*, the detected H<sub>2</sub> stabilized at  $0.065 \pm 0.02$   
221 mM, similar to concentrations observed for co-cultures of *M. barkeri* with ( $0.077 \pm 0.03$  mM) or  
222 without conductive particles ( $0.076 \pm 0.06$  mM) and in pure culture (0.068 mM). This is supported by  
223 previous research, which demonstrated H<sub>2</sub>-cycling (H<sub>2</sub>-production and H<sub>2</sub>-uptake) in *M. barkeri*  
224 (Kulkarni et al., 2009, 2018; Mand et al., 2018). The cellular evolved H<sub>2</sub> is well above the H<sub>2</sub>-uptake  
225 threshold for *M. barkeri* (296 nM - 376 nM) (Kral et al., 1998; Lovley, 1985) possibly because in these  
226 cultures there is an alternative, competitive electron donor.

227 Secondly, if H<sub>2</sub> evolved electrochemically to concentrations under the detection limit (which was not  
228 the case, see above), we anticipated that a sensitive hydrogenotrophic methanogen could effectively  
229 reclaim low concentrations of electrochemical H<sub>2</sub>, draw current and produce methane. To test this  
230 hypothesis we used a highly effective H<sub>2</sub>-utilizing methanogen – *M. formicicum*, which has a low H<sub>2</sub>  
231 uptake threshold of approximately 6 nM (Lovley, 1985). However, when *M. formicicum* was incubated  
232 in electrochemical reactors, neither H<sub>2</sub>, methane nor current draw was observed at – 400 mV (**Fig. 5**)  
233 indicating that methanogenesis from H<sub>2</sub> could not occur at this potential. In addition, to ensure that the  
234 growth of *M. formicicum* was unrestrained by the poised electrode, we carried control incubations at –  
235 400 mV with extrinsic H<sub>2</sub> as substrate. *M. formicicum* was unaffected by a poised electrode since it  
236 produced methane from the extrinsic H<sub>2</sub> in an electrochemical setup (**Fig. S4**).

237 As electrochemical H<sub>2</sub> was unlikely in our electrochemical setup, according to cumulative gas-detection  
238 analyses, electrochemical tests, and tests with a highly effective H<sub>2</sub>-utilizer, we confer that *M. barkeri* is  
239 likely to retrieve electrons directly from the electrode.

#### 240 *Methanosarcina horonobensis*

241 Except for *M. barkeri* and *M. harundinacea*, the distribution of extracellular electron uptake to other  
242 species of the order Methanosarcinales has not been explored. *M. barkeri* and *M. harundinacea* species  
243 have been isolated from and associated with anaerobic wastewater treatment (Bryant and Boone, 1987;

244 De Vrieze et al., 2012; Ma et al., 2006). We were interested to see if other environmentally relevant  
245 *Methanosarcina* species had similar electron-uptake properties. We focused on *Methanosarcina*  
246 *horonobensis* because of its provenience and consistent association with deep aquifers (Holmes et al.,  
247 2018a; Shimizu et al., 2010).

248 *M. horonobensis* did establish successful syntrophic associations with *G. metallireducens* with or  
249 without conductive particles as an electrical conduit (**Fig. 6**). Theoretically, *G. metallireducens* oxidizes  
250 ethanol to acetate only if they could use the methanogen as an electron acceptor (Reaction 1). The  
251 acetate is then further disproportionated by the acetoclastic methanogen to produce methane and CO<sub>2</sub>  
252 (Reaction 2 & 3). During DIET we expect the conversion of 1 mol ethanol to 1.5 mol methane  
253 according to Reactions 1 to 3 (Fig. 1). As predicted, in the *G. metallireducens* – *M. horonobensis* co-  
254 cultures, the syntroph oxidized  $8.8 \pm 0.4$  mM ethanol providing the reducing equivalents (directly and  
255 via acetate) to generate  $13.1 \pm 0.8$  mM CH<sub>4</sub> by the methanogen. These co-cultures achieved  
256 stoichiometric recoveries of  $98.5 \pm 3.3$  %. Similar recoveries ( $109 \pm 18.5$  %) were also observed at the  
257 addition of conductive particles. Single species controls with GAC showed that ethanol could not be  
258 converted to methane by the methanogen or the syntroph alone (**Fig. 6C & S5**). However, similar to  
259 previous reports (Zhang et al., 2018), *Geobacter* could partially convert ethanol to acetate using GAC as  
260 insoluble electron acceptor (Fig. S5; Van Der Zee et al., 2003; Zhang et al., 2018), likely until it reaches  
261 its maximum capacitance of 40 F/g (Zhang et al., 2009). Co-cultures of *G. metallireducens* and *M.*  
262 *horonobensis* could not carry interspecies H<sub>2</sub> transfer because *G. metallireducens* is a strict respiratory  
263 microorganism which cannot ferment ethanol to generate H<sub>2</sub> (Shrestha et al., 2013) and because *M.*  
264 *horonobensis* is unable to use H<sub>2</sub> as electron donor for their metabolism (Shimizu et al., 2010).

265 Surprisingly, *M. horonobensis*, which could grow by DIET, was incapable of electromethanogenesis  
266 (**Fig. 7**). Thus we compared the genomes of the two *Methanosarcina*, *M. horonobensis* and *M. barkeri*  
267 to further explain why they were both capable of DIET, but showed dissimilar activities on cathodes at -  
268 400mV.

269 The main difference between the genomes of *M. barkeri* and *M. horonobensis*, was related to their  
270 energy metabolism (**Table 1**). *M. barkeri* utilizes an energy-converting hydrogenase (Ech) (Kulkarni et  
271 al., 2018), which couples the reduction of protons with ferredoxin (Fdx<sup>-</sup>) to the production of a proton

272 motive force according to the reaction:  $\text{Fdx}^- (\text{red}) + 2\text{H}^+ \rightarrow \text{Fdx} (\text{ox}) + \text{H}_2 + \Delta\mu\text{H}^+ / \Delta\mu\text{Na}^+$  (Thauer et  
273 al., 2008). *M. horonobensis* does not have the Ech (Table 1). An alternative to Ech is the  $\text{Na}^+$ -pumping  
274 Rnf complex described biochemically in *M. acetivorans* (Schlegel et al., 2012; Suharti et al., 2014), and  
275 predicted via genome mining in *M. thermophila* (Wang et al., 2011) and ANME-2 archaea (Wang et al.,  
276 2014). Since we could not find any Ech in the genome of *M. horonobensis*, we screened for the genes  
277 encoding an Rnf-complex. In *M. horonobensis*, we found all eight representative Rnf-genes (including  
278 the cytochrome subunit and Rnf A to G; MSHOH\_3554 to 3561), which showed 65-91% protein  
279 identity to their *M. acetivorans* counterparts (MA\_0658 to 0665).

280 Both Ech and Rnf contain Fe-S centers (Welte and Deppenmeier, 2014), however, the Rnf complex has  
281 an accompanying *c*-type cytochrome (Suharti et al., 2014) possibly influencing the overall redox-  
282 chemistry on the cell surface. We presume that differences in surface redox chemistry will impact how  
283 different *Methanosarcina* interact with extracellular electron donors. Thus, electromethanogenesis at a  
284 set potential of  $-400$  mV is unlikely to match the redox requirements of each type of *Methanosarcina*.  
285 On the other hand, in co-cultures, *Geobacter* may coordinate its cytochrome expression to match the  
286 redox potential of the partner methanogen, who plays the role of a terminal electron acceptor. This is  
287 supported by previous studies showing *Geobacter* modulates their cell-surface proteins to match the  
288 electron acceptor provided (Ishii et al., 2018; Otero et al., 2018).

289 When contrasting the genomes of the two *Methanosarcina* species we also observed significant  
290 differences regarding nitrogen fixation, mobile elements, and sensing/chemotaxis proteins (**Table 2**). As  
291 such, compared to *M. horonobensis*, *M. barkeri* encodes for more  $\text{N}_2$ -fixation proteins (86%).  
292 Compared to *M. barkeri*, *M. horonobensis* encodes for more small-molecule-interaction proteins such  
293 as redox-sensing and chemotaxis proteins (185%) and mobile elements than *M. barkeri* (16 fold  
294 increase) (**Table 2**). The exact role of these proteins in extracellular electron uptake by these  
295 *Methanosarcinas* is unknown and warrants further investigation.

296 Furthermore, to determine why *Methanosarcina* could do DIET, but not *Methanobacterium*, we  
297 compared the genomes of the two *Methanosarcina* species with that of *M. formicicum* (**Table 2**). In  
298 contrast to the *Methanobacterium*, both *Methanosarcina* species encode in their genomes three times  
299 the amount of genes for electron transport proteins and circa 50% more genes for cell surface and

300 transport proteins (**Table 2**). Especially, outer surface S-layer proteins were only present in the two  
301 *Methanosarcina* (Table 2). S-layer proteins were previously suggested to play a role in extracellular  
302 electron transfer in *Methanosarcina* related ANME-2, which carry anaerobic methane oxidation  
303 syntrophically (McGlynn, 2017; McGlynn et al., 2015; Timmers et al., 2017). Future gene-expression  
304 and deletion studies could shed light on the possible role of S-layer proteins in DIET-interactions.

## 305 **Conclusion**

306 Three methanogens were investigated for their ability to do extracellular electron uptake from (1) a  
307 cathode at -400 mV, (2) directly from an electrogenic-DIET partner or (3) from a DIET-partner, but  
308 mediated by conductive particles. Only *M. barkeri* was able to carry out all three forms of extracellular  
309 electron uptake, making this the first observation of a *Methanosarcina* in pure culture performing  
310 electromethanogenesis. The conditions in our abiotic electrochemical controls did not lead to H<sub>2</sub>-  
311 evolution at -400mV, according to electrochemical and analytical tests. Therefore, under these  
312 conditions, it was impossible to sustain a methanogen with high H<sub>2</sub>-affinity, like *M. formicicum*.  
313 Besides *M. formicicum* was incapable to retrieve electrons directly from the electrode or from a DIET  
314 partner (direct or via conductive particles). In this study, we also demonstrated that another  
315 *Methanosarcina*, *M. hornobensis* performed DIET with *Geobacter* (direct or via conductive particles).  
316 However, surprisingly, *M. hornobensis* was incapable of electromethanogenesis. We screened the  
317 genomes of the two *Methanosarcina* and identified differences (e.g. energy metabolism), which could  
318 lead to phenotypic variability and thus contrasting electromethanogenesis-ability. Compared to *M.*  
319 *barkeri*, *M. hornobensis* is a better candidate for understanding electron uptake from a DIET  
320 syntrophic partner. This is because unlike *M. barkeri*, *M. hornobensis* does not utilize H<sub>2</sub>, and it grows  
321 as single cells on freshwater media, which is ideal for genetic studies.

## 322 **Acknowledgments**

323 The Innovationsfond grant number 4106-00017 funded this work. We would like to thank Lasse Ørum  
324 Smidt and Heidi Grøn Jensen for lab assistance.

## 325 **Author contribution**

326 MY and A-ER conceived the study with support from BT and LO. MY performed all experiments with  
327 support from OS. MY analyzed the data with support from A-ER. MY wrote the manuscript with help  
328 from A-ER. All authors (MY, A-ER, BT, OS and LO) contributed to drafting and editing the  
329 manuscript.

## 330 **References**

- 331 Aklujkar, M., Krushkal, J., Dibartolo, G., Lapidus, A., Land, M. L., and Lovley, D. R. (2009). The  
332 genome sequence of *Geobacter metallireducens*: Features of metabolism, physiology and  
333 regulation common and dissimilar to *Geobacter sulfurreducens*. *BMC Microbiol.* 9, 1–22.  
334 doi:10.1186/1471-2180-9-109.
- 335 Batlle-Vilanova, P., Puig, S., Gonzalez-Olmos, R., Vilajeliu-Pons, A., Bañeras, L., Balaguer, M. D., et  
336 al. (2014). Assessment of biotic and abiotic graphite cathodes for hydrogen production in  
337 microbial electrolysis cells. *Int. J. Hydrogen Energy* 39, 1297–1305.  
338 doi:10.1016/j.ijhydene.2013.11.017.
- 339 Beese-Vasbender, P. F., Grote, J.-P., Garrelfs, J., Stratmann, M., and Mayrhofer, K. J. J. (2015).  
340 Selective microbial electrosynthesis of methane by a pure culture of a marine lithoautotrophic  
341 archaeon. *Bioelectrochemistry* 102, 50–55. doi:10.1016/j.bioelechem.2014.11.004.
- 342 Bryant, M. P., and Boone, D. R. (1987). Emended Description of Strain MST(DSM 800T), the Type  
343 Strain of *Methanosarcina barkeri*. *Int. J. Syst. Bacteriol.* 37, 169–170. doi:10.1099/00207713-37-2-  
344 169.
- 345 Buckel, W., and Thauer, R. K. (2013). Energy conservation via electron bifurcating ferredoxin  
346 reduction and proton/Na<sup>+</sup> translocating ferredoxin oxidation. *Biochim. Biophys. Acta - Bioenerg.*  
347 1827, 94–113. doi:10.1016/j.bbabi.2012.07.002.
- 348 Buckel, W., and Thauer, R. K. (2018). Flavin-based electron bifurcation, ferredoxin, flavodoxin, and  
349 anaerobic respiration with protons (Ech) or NAD<sup>+</sup>(Rnf) as electron acceptors: A historical review.  
350 *Front. Microbiol.* 9. doi:10.3389/fmicb.2018.00401.

- 351 Chen, S., Rotaru, A.-E., Liu, F., Philips, J., Woodard, T. L., Nevin, K. P., et al. (2014a). Carbon cloth  
352 stimulates direct interspecies electron transfer in syntrophic co-cultures. *Bioresour. Technol.* 173,  
353 82–86. doi:10.1016/j.biortech.2014.09.009.
- 354 Chen, S., Rotaru, A.-E., Shrestha, P. M., Malvankar, N. S., Liu, F., Fan, W., et al. (2014b). Promoting  
355 Interspecies Electron Transfer with Biochar. *Sci. Rep.* 4, 1–7. doi:10.1038/srep05019.
- 356 Cheng, S., Xing, D., Call, D. F., and Logan, B. E. (2009). Direct biological conversion of electrical  
357 current into methane by electromethanogenesis. *Environ. Sci. Technol.* 43, 3953–3958.  
358 doi:10.1021/es803531g.
- 359 Cord-Ruwisch, R., Lovley, D. R., & Schink, B. (1998). Growth of *Geobacter sulfurreducens* with  
360 acetate in syntrophic cooperation with hydrogen-oxidizing anaerobic partners. *Appl. Environ.*  
361 *Microbiol.*, 64(6), 2232–2236.
- 362 Dang, Y., Holmes, D. E., Zhao, Z., Woodard, T. L., Zhang, Y., Sun, D., et al. (2016). Enhancing  
363 anaerobic digestion of complex organic waste with carbon-based conductive materials. *Bioresour.*  
364 *Technol.* 220, 516–522. doi:10.1016/j.biortech.2016.08.114.
- 365 De Vrieze, J., Hennebel, T., Boon, N., and Verstraete, W. (2012). Methanosarcina: the rediscovered  
366 methanogen for heavy duty biomethanation. *Bioresour. Technol.* 112, 1–9.  
367 doi:10.1016/j.biortech.2012.02.079.
- 368 Holmes, D. E., Orelana, R., Giloteaux, L., Wang, L.-Y., Shrestha, P. M., Williams, K., et al. (2018a).  
369 Potential for Methanosarcina to Contribute to Uranium Reduction during Acetate-Promoted  
370 Groundwater Bioremediation. *Microb. Ecol.*, 1–8. doi:10.1007/s00248-018-1165-5.
- 371 Holmes, D. E., Rotaru, A.-E., Ueki, T., Shrestha, P. M., Ferry, J. G., and Lovley, D. R. (2018b).  
372 Electron and Proton Flux for Carbon Dioxide Reduction in *Methanosarcina barkeri* During Direct  
373 Interspecies Electron Transfer. *Front. Microbiol.* 9, 3109. doi:10.3389/fmicb.2018.03109.
- 374 Holmes, D. E., Shrestha, P. M., Walker, D. J. F., Dang, Y., Nevin, K. P., Woodard, T. L., et al. (2017a).  
375 Metatranscriptomic Evidence for Direct Interspecies Electron Transfer Between *Geobacter* and

- 376 Methanotherix Species in Methanogenic Rice Paddy Soils. *Appl. Environ. Microbiol.*, AEM.00223-  
377 17. doi:10.1128/AEM.00223-17.
- 378 Holmes, D. E., Shrestha, P. M., Walker, D. J. F., Dang, Y., Nevin, K. P., Woodard, T. L., et al. (2017b).  
379 Metatranscriptomic Evidence for Direct Interspecies Electron Transfer between *Geobacter* and  
380 Methanotherix Species in Methanogenic Rice Paddy Soils. *Appl. Environ. Microbiol.* 83, e00223-  
381 17. doi:10.1128/AEM.00223-17.
- 382 Ishii, S., Suzuki, S., Tenney, A., Nealson, K. H., and Bretschger, O. (2018). Comparative  
383 metatranscriptomics reveals extracellular electron transfer pathways conferring microbial  
384 adaptivity to surface redox potential changes. *ISME J.* doi:10.1038/s41396-018-0238-2.
- 385 Kral, T. A., Brink, K. M., Miller, S. L., and McKay, C. P. (1998). Hydrogen consumptions by  
386 methanogens on the early earth. *Orig. Life Evol. Biosph.* 28, 311–319. doi:Doi  
387 10.1023/A:1006552412928.
- 388 Kulkarni, G., Kridelbaugh, D. M., Guss, A. M., and Metcalf, W. W. (2009). Hydrogen is a preferred  
389 intermediate in the energy-conserving electron transport chain of *Methanosarcina barkeri*. *Proc.*  
390 *Natl. Acad. Sci. U. S. A.* 106, 15915–20. doi:10.1073/pnas.0905914106.
- 391 Kulkarni, G., Mand, T. D., and Metcalf, W. W. (2018). Energy Conservation via Hydrogen Cycling in  
392 the Methanogenic Archaeon *Methanosarcina barkeri*. *MBio* 9, 1–10. doi:10.1128/mBio.01256-18.
- 393 Lee, J. Y., Lee, S. H., and Park, H. D. (2016). Enrichment of specific electro-active microorganisms and  
394 enhancement of methane production by adding granular activated carbon in anaerobic reactors.  
395 *Bioresour. Technol.* 205, 205–212. doi:10.1016/j.biortech.2016.01.054.
- 396 Lin, Q., Fang, X., Ho, A., Li, J., Yan, X., Tu, B., et al. (2017). Different substrate regimes determine  
397 transcriptional profiles and gene co-expression in *Methanosarcina barkeri* (DSM 800). *Appl.*  
398 *Microbiol. Biotechnol.*, 1–14. doi:10.1007/s00253-017-8457-4.
- 399 Liu, F., Rotaru, A.-E., Shrestha, P. M., Malvankar, N. S., Nevin, K. P., and Lovley, D. R. (2012).  
400 Promoting direct interspecies electron transfer with activated carbon. *Energy Environ. Sci.* 5, 8982.

401 doi:10.1039/c2ee22459c.

402 Lovley, D. R. (1985). Minimum threshold for hydrogen metabolism in methanogenic bacteria. *Appl.*  
403 *Environ. Microbiol.* 49, 1530–1.

404 Lovley, D. R. (2017). Syntrophy Goes Electric: Direct Interspecies Electron Transfer. *Annu. Rev.*  
405 *Microbiol.* 71, annurev-micro-030117-020420. doi:10.1146/annurev-micro-030117-020420.

406 Lovley, D. R., Giovannoni, S. J., White, D. C., Champine, J. E., Phillips, E. J. P., Gorby, Y. A., et al.  
407 (1993). *Geobacter metallireducens* gen. nov. sp. nov., a microorganism capable of coupling the  
408 complete oxidation of organic compounds to the reduction of iron and other metals. *Arch*  
409 *Microbiol* 159, 336–344.

410 Ma, K., Liu, X., and Dong, X. (2006). *Methanosaeta harundinacea* sp. nov., a novel acetate-scavenging  
411 methanogen isolated from a UASB reactor. *Int. J. Syst. Evol. Microbiol.* 56, 127–131.  
412 doi:10.1099/ijss.0.63887-0.

413 Mand, T. D., Kulkarni, G., and Metcalf, W. W. (2018). Genetic, Biochemical, and Molecular  
414 Characterization of *Methanosarcina barkeri* Mutants Lacking Three Distinct Classes of  
415 Hydrogenase. *J. Bacteriol.* 200, e00342-18. doi:10.1128/JB.00342-18.

416 McGlynn, S. E. (2017). Energy Metabolism during Anaerobic Methane Oxidation in ANME Archaea.  
417 *Microbes Environ.* 32, 5–13. doi:10.1264/jsme2.ME16166.

418 McGlynn, S. E., Chadwick, G. L., Kempes, C. P., and Orphan, V. J. (2015). Single cell activity reveals  
419 direct electron transfer in methanotrophic consortia. *Nature* 526, 531–535.  
420 doi:10.1038/nature15512.

421 Meuer, J., Kuettner, H. C., Zhang, J. K., Hedderich, R., and Metcalf, W. W. (2002). Genetic analysis of  
422 the archaeon *Methanosarcina barkeri* Fusaro reveals a central role for Ech hydrogenase and  
423 ferredoxin in methanogenesis and carbon fixation. *Proc. Natl. Acad. Sci.* 99, 5632–5637.  
424 doi:10.1073/pnas.072615499.

425 Mitov, M., Chorbadzhiyska, E., Rashkov, R., and Hubenova, Y. (2012). Novel nanostructured



- 426 electrocatalysts for hydrogen evolution reaction in neutral and weak acidic solutions. *Int. J.*  
427 *Hydrogen Energy* 37, 16522–16526. doi:10.1016/J.IJHYDENE.2012.02.102.
- 428 Morris, B. E. L., Henneberger, R., Huber, H., and Moissl-Eichinger, C. (2013). Microbial syntrophy:  
429 interaction for the common good. *FEMS Microbiol. Rev.* 37, 384–406. doi:10.1111/1574-  
430 6976.12019.
- 431 Otero, F. J., Chan, C. H., and Bond, D. R. (2018). Identification of Different Putative Outer Membrane  
432 Electron Conduits Necessary for Fe(III) Citrate, Fe(III) Oxide, Mn(IV) Oxide, or Electrode  
433 Reduction by *Geobacter sulfurreducens* Downloaded from. *J. Bacteriol.* 200, 347–365.  
434 doi:10.1128/JB.00347-18.
- 435 Rotaru, A.-E., Calabrese, F., Stryhanyuk, H., Musat, F., Shrestha, P. M., Weber, H. S., et al. (2018a).  
436 Conductive Particles Enable Syntrophic Acetate Oxidation between *Geobacter* and  
437 *Methanosarcina* from Coastal Sediments. *MBio* 9, 1–14. doi:10.1128/mBio.00226-18.
- 438 Rotaru, A.-E., Posth, N. R., Miracle, M. R., Vicente, E., Cox, R. P., Thompson, J., et al. (2018b).  
439 Interspecies interactions mediated by conductive minerals in the sediments of the ferruginous Lake  
440 La Cruz, Spain. *Limnetica*, 1–30.
- 441 Rotaru, A.-E., Shrestha, P. M., Liu, F., Markovaite, B., Chen, S., Nevin, K. P., et al. (2014a). Direct  
442 Interspecies Electron Transfer between *Geobacter metallireducens* and *Methanosarcina barkeri*.  
443 *Appl. Environ. Microbiol.* 80, 4599–4605. doi:10.1128/AEM.00895-14.
- 444 Rotaru, A.-E., Shrestha, P. M., Liu, F., Shrestha, M., Shrestha, D., Embree, M., et al. (2014b). A new  
445 model for electron flow during anaerobic digestion: direct interspecies electron transfer to  
446 *Methanosaeta* for the reduction of carbon dioxide to methane. *Energy Environ. Sci.* 7, 408–415.  
447 doi:10.1039/C3EE42189A.
- 448 Rotaru, A.-E., Woodard, T. L., Nevin, K. P., and Lovley, D. R. (2015). Link between capacity for  
449 current production and syntrophic growth in *Geobacter* species. *Front. Microbiol.* 6, 1–8.  
450 doi:10.3389/fmicb.2015.00744.

- 451 Salvador, A. F., Martins, G., Melle-Franco, M., Serpa, R., Stams, A. J. M., Cavaleiro, A. J., et al.  
452 (2017). Carbon nanotubes accelerate methane production in pure cultures of methanogens and in a  
453 syntrophic coculture. *Environ. Microbiol.* 19, 2727–2739. doi:10.1111/1462-2920.13774.
- 454 Schlegel, K., Welte, C., Deppenmeier, U., and Müller, V. (2012). Electron transport during acetoclastic  
455 methanogenesis by *Methanosarcina acetivorans* involves a sodium-translocating Rnf complex.  
456 *FEBS J.* 279, 4444–4452. doi:10.1111/febs.12031.
- 457 Seiler, M., Mehrle, A., Poustka, A., and Wiemann, S. (2006). The 3of5 web application for complex  
458 and comprehensive pattern matching in protein sequences. *BMC Bioinformatics* 7, 1–12.  
459 doi:10.1186/1471-2105-7-144.
- 460 Shimizu, S., Upadhye, R., Ishijima, Y., and Naganuma, T. (2010). *Methanosarcina horonobensis* sp.  
461 nov., a methanogenic archaeon isolated from a deep subsurface Miocene formation. *Int. J. Syst.*  
462 *Evol. Microbiol.* 61, 2503–2507. doi:10.1099/ijs.0.028548-0.
- 463 Shrestha, P. M., and Rotaru, A.-E. (2014). Plugging in or going wireless: strategies for interspecies  
464 electron transfer. *Front. Microbiol.* 5, 1–8. doi:10.3389/fmicb.2014.00237.
- 465 Shrestha, P. M., Rotaru, A.-E., Aklujkar, M., Liu, F., Shrestha, M., Summers, Z. M., et al. (2013).  
466 Syntrophic growth with direct interspecies electron transfer as the primary mechanism for energy  
467 exchange. *Environ. Microbiol. Rep.* 5, 904–910. doi:10.1111/1758-2229.12093.
- 468 Smith, T. J., and Stevenson, K. J. (2007). “Reference electrodes,” in *Handbook of Electrochemistry*  
469 (Elsevier B.V.), 73–110. doi:10.1016/B978-0-444-51958-0.50005-7.
- 470 Stams, A. J. M., and Plugge, C. M. (2009). Electron transfer in syntrophic communities of anaerobic  
471 bacteria and archaea. *Nat. Rev. Microbiol.* 7, 568–577. doi:10.1038/nrmicro2166.
- 472 Suharti, S., Wang, M., De Vries, S., and Ferry, J. G. (2014). Characterization of the RnfB and RnfG  
473 subunits of the Rnf complex from the archaeon *Methanosarcina acetivorans*. *PLoS One* 9, 1–10.  
474 doi:10.1371/journal.pone.0097966.
- 475 Thauer, R. K., Kaster, A.-K., Seedorf, H., Buckel, W., and Hedderich, R. (2008). Methanogenic

- 476 archaea: ecologically relevant differences in energy conservation. *Nat. Rev. Microbiol.* 6, 579–591.  
477 doi:10.1038/nrmicro1931.
- 478 Timmers, P. H. A., Welte, C. U., Koehorst, J. J., Plugge, C. M., Jetten, M. S. M., and Stams, A. J. M.  
479 (2017). Reverse Methanogenesis and Respiration in Methanotrophic Archaea. *Archaea* 2017.  
480 doi:10.1155/2017/1654237.
- 481 Van Der Zee, F. P., Bisschops, I. A. E., Lettinga, G., & Field, J. A. (2003). Activated carbon as an  
482 electron acceptor and redox mediator during the anaerobic biotransformation of azo dyes. *Environ.*  
483 *Sci. Technol.*, 37(2), 402–408. <https://doi.org/10.1021/es025885o>
- 484 Wang, F. P., Zhang, Y., Chen, Y., He, Y., Qi, J., Hinrichs, K.-U., et al. (2014). Methanotrophic archaea  
485 possessing diverging methane-oxidizing and electron-Transporting pathways. *ISME J.* 8, 1069–  
486 1078. doi:10.1038/ismej.2013.212.
- 487 Wang, M., Tomb, J.-F., and Ferry, J. G. (2011). Electron transport in acetate-grown *Methanosarcina*  
488 *acetivorans*. *BMC Microbiol.* 11. doi:10.1186/1471-2180-11-165.
- 489 Wang, O., Zheng, S., Wang, B., Wang, W., and Liu, F. (2018). Necessity of electrically conductive pili  
490 for methanogenesis with magnetite stimulation. *PeerJ* 6, e4541. doi:10.7717/peerj.4541.
- 491 Welte, C. U., and Deppenmeier, U. (2014). Bioenergetics and anaerobic respiratory chains of  
492 acetoclastic methanogens. *Biochim. Biophys. Acta - Bioenerg.* 1837, 1130–1147.  
493 doi:10.1016/j.bbabi.2013.12.002.
- 494 Ye, Q., Zhang, Z., Huang, Y., Fang, T., Cui, Q., He, C., et al. (2018). Enhancing electron transfer by  
495 magnetite during phenanthrene anaerobic methanogenic degradation. *Int. Biodeterior. Biodegrad.*,  
496 0–1. doi:10.1016/j.ibiod.2018.01.012.
- 497 Zhang, L., Zhang, J., and Loh, K. C. (2018). Activated carbon enhanced anaerobic digestion of food  
498 waste – Laboratory-scale and Pilot-scale operation. *Waste Manag.* 75, 270–279.  
499 doi:10.1016/j.wasman.2018.02.020.
- 500 Zhang, P., Zheng, S., Liu, J., Wang, B., Liu, F., & Feng, Y. (2018). Surface properties of activated

- 501 sludge-derived biochar determine the facilitating effects on *Geobacter* co-cultures. *Water Res.*,  
502 142, 441–451. <https://doi.org/10.1016/j.watres.2018.05.058>
- 503 Zhang, Y., Feng, H., Wu, X., Wang, L., Zhang, A., Xia, T., ... Zhang, L. (2009). Progress of  
504 electrochemical capacitor electrode materials: A review. *Int. J. Hydrogen Energy*, 34(11), 4889–  
505 4899. <https://doi.org/10.1016/j.ijhydene.2009.04.005>
- 506 Zheng, S., Zhang, H., Li, Y., Zhang, H., Wang, O., Zhang, J., et al. (2015). Co-occurrence of  
507 *Methanosarcina mazei* and *Geobacteraceae* in an iron (III)-reducing enrichment culture. *Front.*  
508 *Microbiol.* 6, 1–12. doi:10.3389/fmicb.2015.00941.
- 509 Zhuang, L., Tang, J., Wang, Y., Hu, M., and Zhou, S. (2015). Conductive iron oxide minerals accelerate  
510 syntrophic cooperation in methanogenic benzoate degradation. *J. Hazard. Mater.* 293, 37–45.  
511 doi:10.1016/j.jhazmat.2015.03.039.

512

513 **Figures**

514 (Fig. 1) Diagram of electron flow during DIET interactions between *Geobacter metallireducens* and  
515 *Methanosarcina*-species provided with ethanol as sole electron donor.

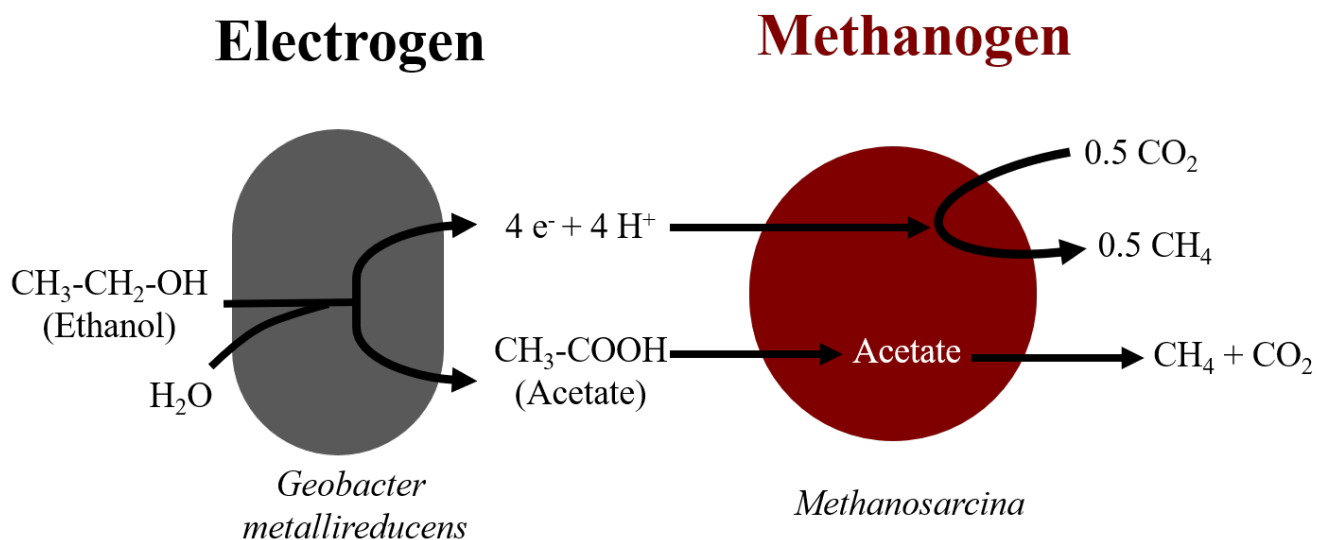

**Total reaction: 1 mol Ethanol  $\longrightarrow$  1.5 mol  $\text{CH}_4$  + 0.5 mol  $\text{CO}_2$**

516

517

518

519 (Fig. 2) Co-cultures experiments with *M. formicicum* and *G. metallireducens* (n=3). *M. formicicum* did  
520 not produce methane when incubated with *G. metallireducens* in the presence (A) or absence of GAC  
521 (B). Alone, *M. formicicum* could not utilize ethanol or produce methane in the presence of GAC. MF -  
522 *Methanobacterium formicicum*, GM - *Geobacter metallireducens*, GAC - granular activated carbon.

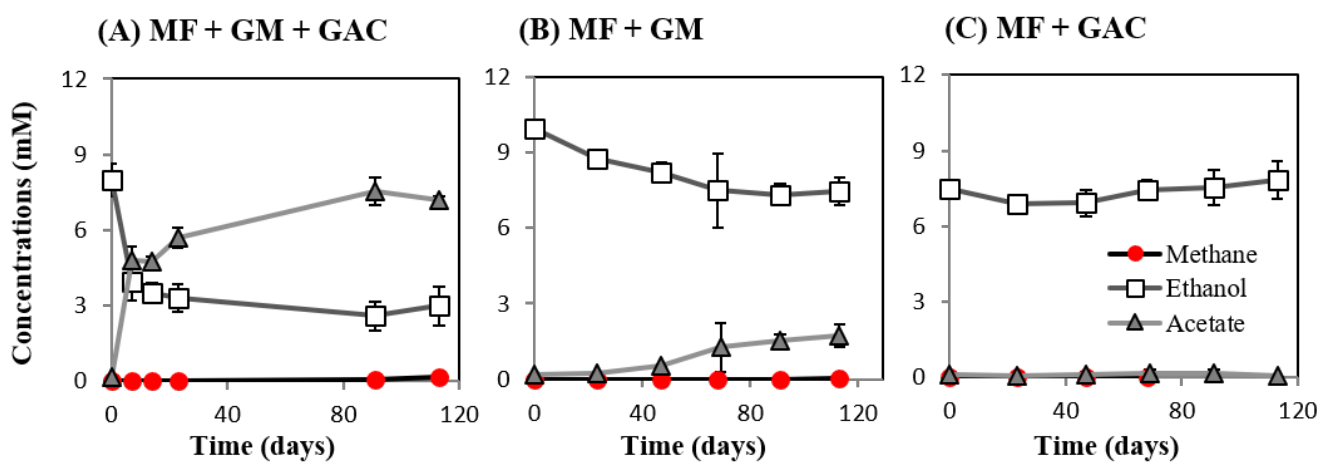

523

524 (Fig. 3) Current consumption and gas production in triplicate *M. barkeri* cultures provided with a poised  
525 cathode at -400 mV (vs. SHE) as sole electron donor.

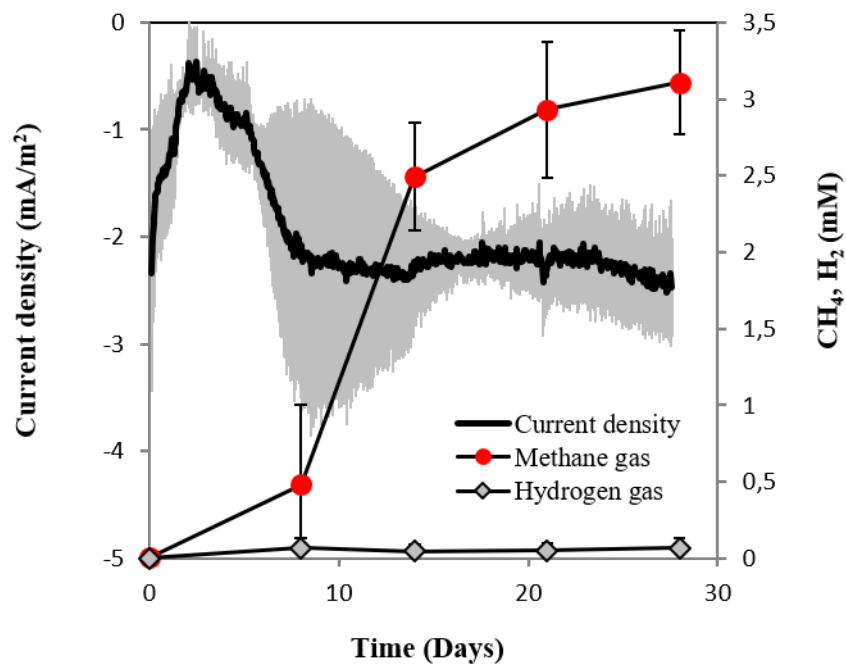

526

527 (Fig. 4) (A) Current consumption and gas production in four abiotic reactors at -400 mV (vs. SHE) and  
528 (B) Linear Sweep Voltammetry (LSV) of abiotic reactors at the start and end of the experiment (n=3).

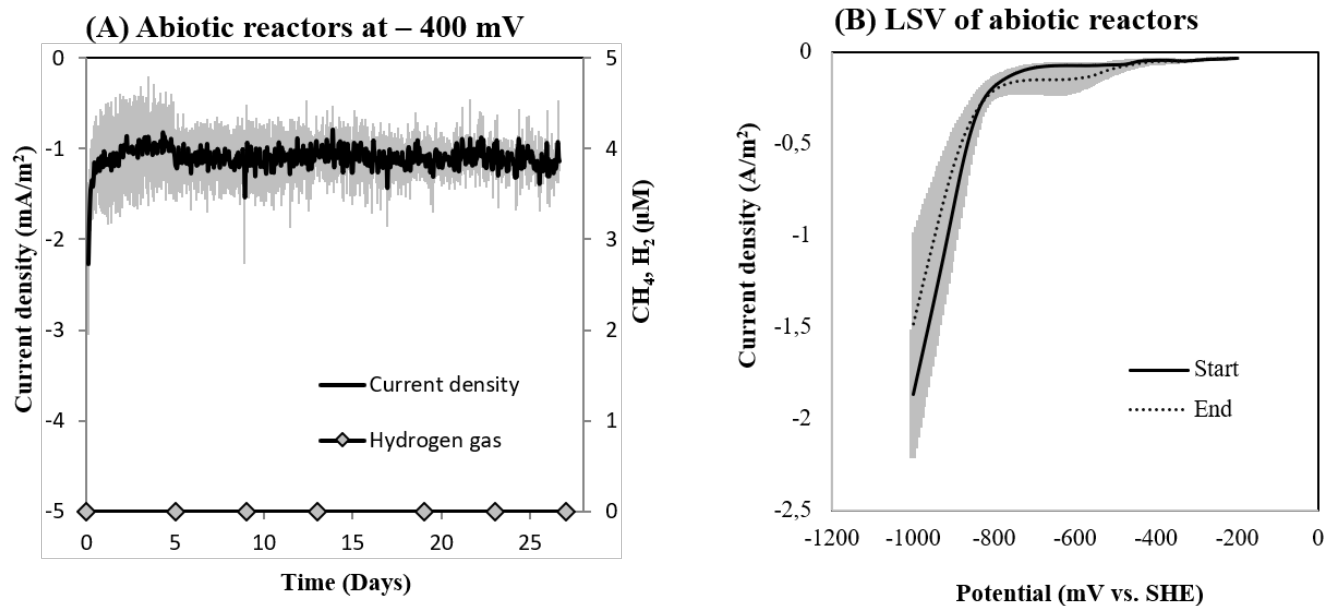

529  
530



531 (Fig. 5) Current consumption and gas production in triplicate *M. formicicum* cultures provided with a  
532 cathode poised at - 400 mV (vs. SHE) as sole electron donor.

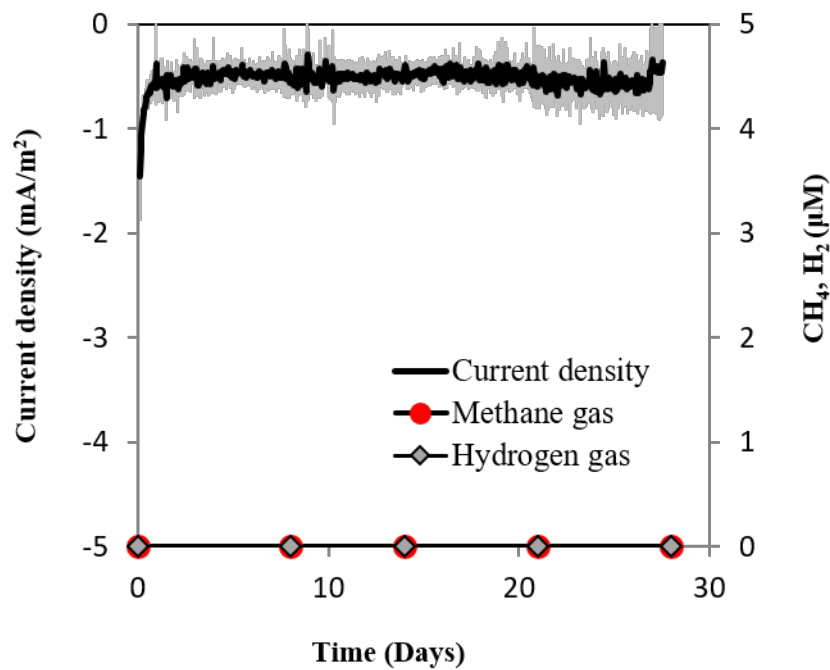

533

534 (Fig. 6) Co-culture experiments with *M. horonobensis* and *G. metallireducens*. *M. horonobensis*  
535 established successful co-cultures with *G. metallireducens* as apparent from ethanol utilization and  
536 methane production in the presence (A, n=3) or absence of GAC (B, n=1; see replication in Fig. S6).  
537 Alone, *M. horonobensis* could not utilize ethanol or produce methane in the presence of GAC (C, n=3).  
538 MH - *Methanosarcina horonobensis*, GM - *Geobacter metallireducens*, GAC - granular activated  
539 carbon.

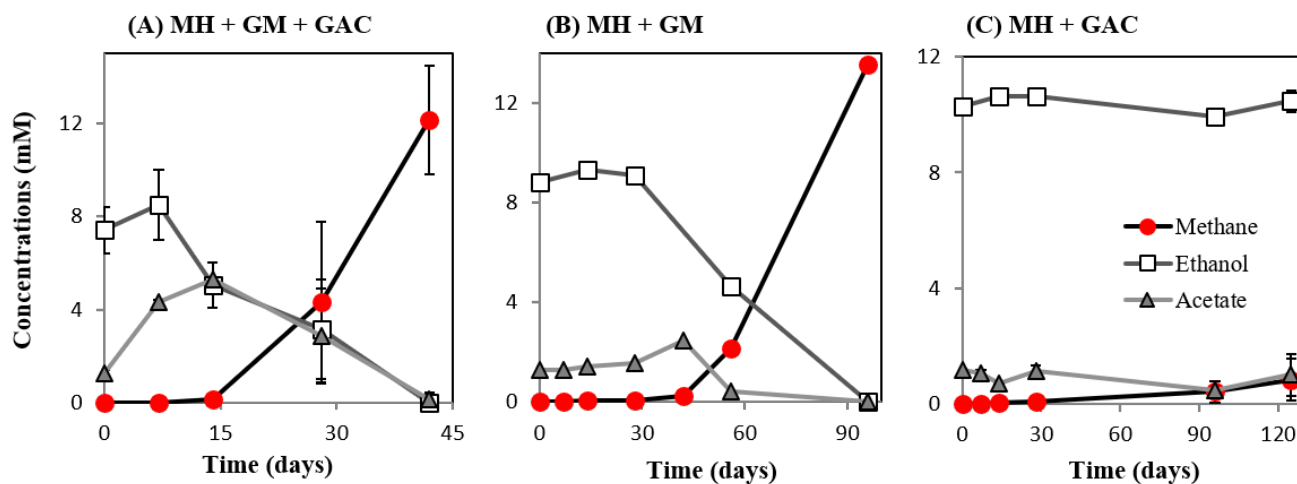

540

541 (Fig. 7) Current consumption and gas production in cultures of *M. horonobensis* (n=3) provided with a  
542 cathode poised at - 400 mV (vs. SHE) as sole electron donor.

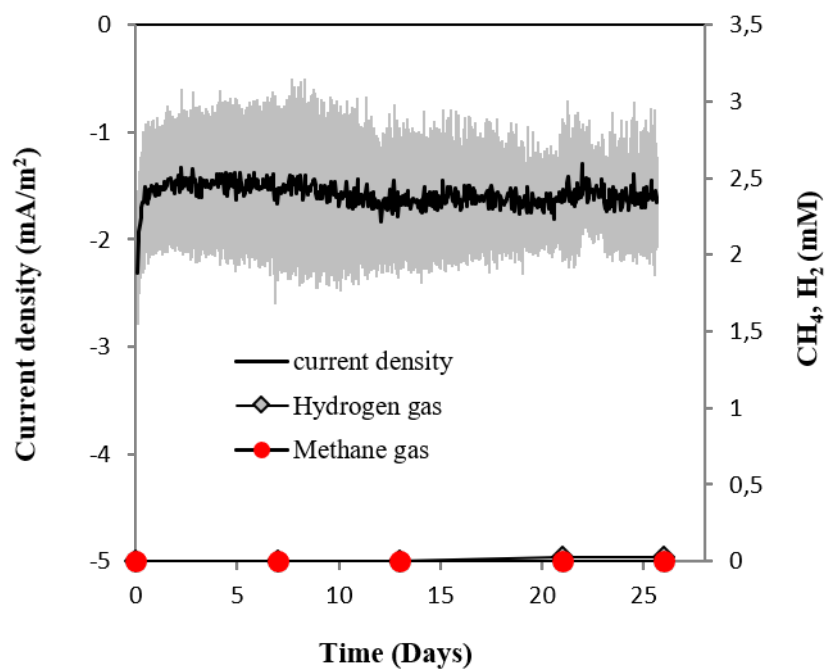

543

544

545 **Tables**

546 (Table 1) Relevant genotypic differences between the methanogens tested during this study

| Species                                    | Energy conservation   | S-layer proteins | Predicted c-type cytochromes (CxxCH motif proteins) | Other cytochromes | Predicted Ferredoxins | Predicted thioredoxins |
|--------------------------------------------|-----------------------|------------------|-----------------------------------------------------|-------------------|-----------------------|------------------------|
| <i>Methanosarcina barkeri</i> MS           | Ech-hydrogenase       | 8                | 20 (0/1 multiheme*)                                 | 3 (cyt b)         | 4                     | 10                     |
| <i>Methanosarcina horonobensis</i> HB-1    | Rnf-complex           | 9                | 30 (3 multiheme)                                    | 3 (cyt b)         | 6                     | 8                      |
| <i>Methanobacterium formicicum</i> DSM1535 | EhaA/EhbA hydrogenase | None             | 16 (None)                                           | None              | 4                     | 2                      |

\*The predicted multiheme cytochrome in *M. barkeri* strain MS had one standard CxxCH and one CxCH motif.

547  
548

549 (Table 2) Genomic comparison of three methanogens based on TIGR family protein categories.

| TIGRfam Categories                                         | No. of genes associated within a TIGR family |                               |                                    |
|------------------------------------------------------------|----------------------------------------------|-------------------------------|------------------------------------|
|                                                            | <i>Methanosarcina horonobensis</i>           | <i>Methanosarcina barkeri</i> | <i>Methanobacterium formicicum</i> |
| Fatty acid and phospholipid metabolism                     | 3                                            | 4                             | 3                                  |
| Transcription                                              | 13                                           | 12                            | 13                                 |
| Central intermediary metabolism                            | 21                                           | 27                            | 21                                 |
| - Nitrogen fixation                                        | 7                                            | 13                            | 7                                  |
| Cell processes                                             | 26                                           | 18                            | 22                                 |
| Cell envelope                                              | 28                                           | 27                            | 14                                 |
| - Surface structures (S-layer)                             | 9                                            | 8                             | 0                                  |
| Purines, pyrimidines, nucleosides, and nucleotides         | 33                                           | 33                            | 33                                 |
| Mobile and extrachromosomal element functions              | 39                                           | 2                             | 2                                  |
| - Transposons                                              | 32                                           | 2                             | 0                                  |
| DNA metabolism                                             | 43                                           | 38                            | 27                                 |
| Protein fate                                               | 48                                           | 44                            | 33                                 |
| Amino acid biosynthesis                                    | 56                                           | 57                            | 57                                 |
| Biosynthesis of cofactors, prosthetic groups, and carriers | 60                                           | 61                            | 65                                 |
| - Heme, prothyrin, cobalamin                               | 22                                           | 25                            | 19                                 |
| Regulatory functions                                       | 84                                           | 33                            | 51                                 |
| - Small molecule interactions                              | 77                                           | 27                            | 40                                 |
| Protein synthesis                                          | 87                                           | 89                            | 75                                 |
| Energy metabolism                                          | 95                                           | 86                            | 64                                 |
| - Electron transport proteins                              | 21                                           | 17                            | 7                                  |
| Transport and binding proteins                             | 97                                           | 85                            | 63                                 |
| - Iron carrying compounds                                  | 51                                           | 44                            | 29                                 |
| - Aminoacids and amines                                    | 17                                           | 12                            | 0                                  |
| Unknown and hypothetical                                   | 119                                          | 78                            | 92                                 |

550
