# Supplementary material for: Extracellular Electron Uptake by Two Methanosarcina Species
Source: bioRxiv or medRxiv preprint supplement (doi:10.1101/458091), 2019-01-14
Supplement: Supplementary file [file 458091-1.pdf]

1 **Supplementary Figures**

2

3

4

5

6

7

8

9

10

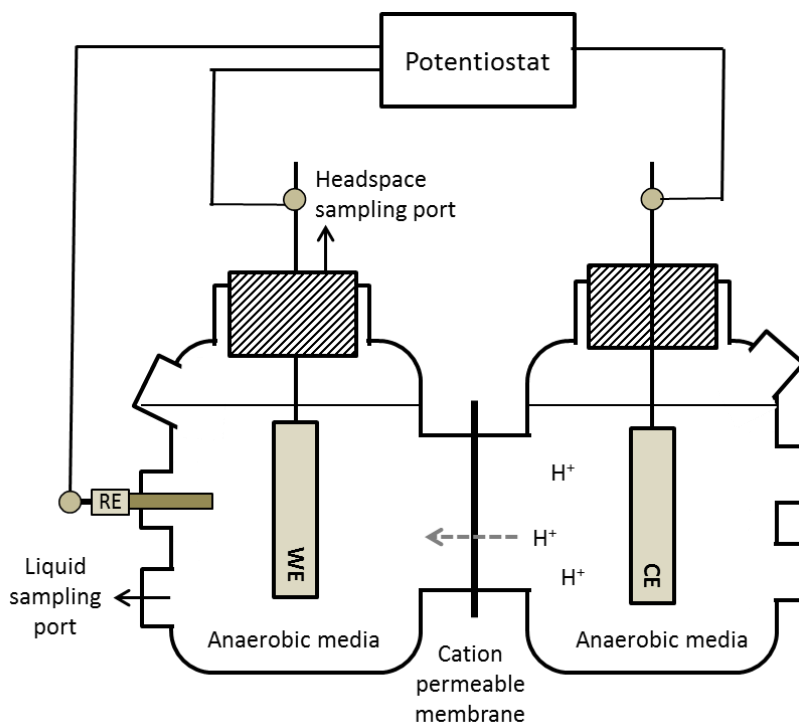

11 **(Fig. S1)** Two chambered electrochemical reactors separated by a proton exchange membrane. RE;

12 reference electrode, WE; working electrode, CE; counter electrode.

13

14

15

16

17

18

19

20

21

22

23

24

25

26

27

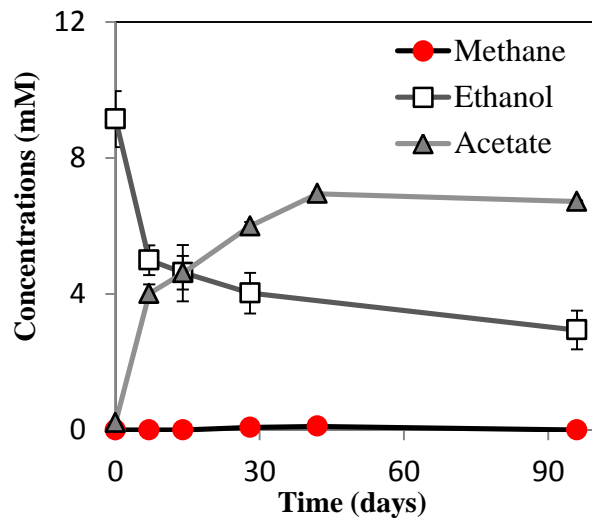

28 **(Fig. S2)** *G.metallireducens* with ethanol as the sole substrate ammended with granular activated  
29 carbon. Error bars are based on standard deviation (n=3). Circles; Methane, Squares; Ethanol,  
30 Triangles; Acetate .

31

32

33

34

35

36

37

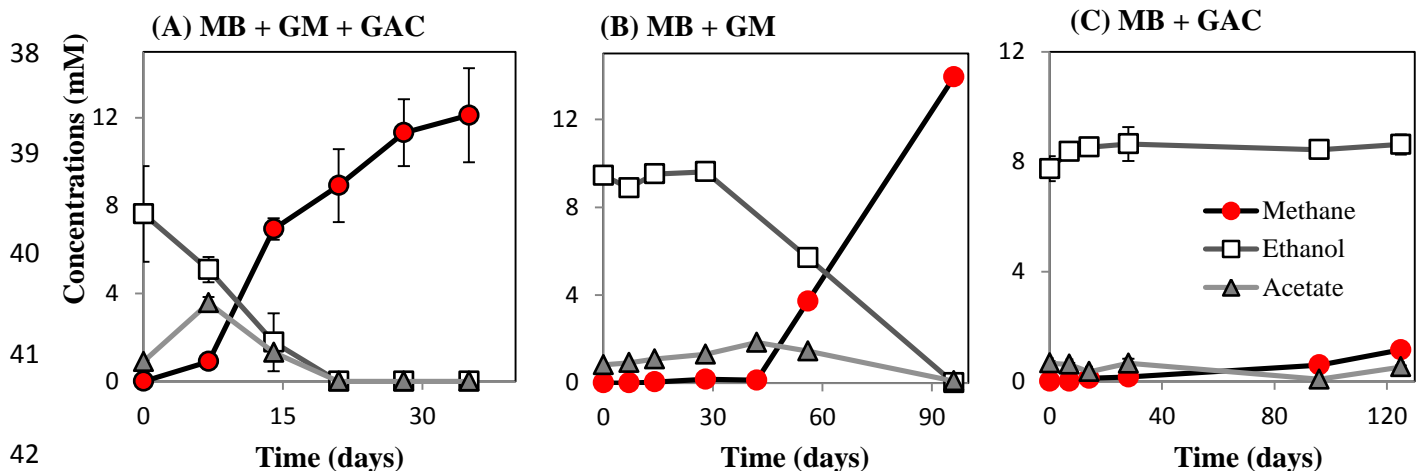

43 (Fig. S3) Co-cultures of *M. barkeri* with *G.metallireducens* feeding on ethanol with or without GAC.

44 MH; *Methanosarcina barkeri*, GM; *Geobacter metallireducens*, GAC; granular activated carbon,

45 Circles; Methane, Squares; Ethanol, Triangles; Acetate. The results are from triplicate samples except

46 for (B) which is a representative sample for which the rest of the replicate data is presented in Fig S4.

47

48

49

50

51

52

(A) MB + GM

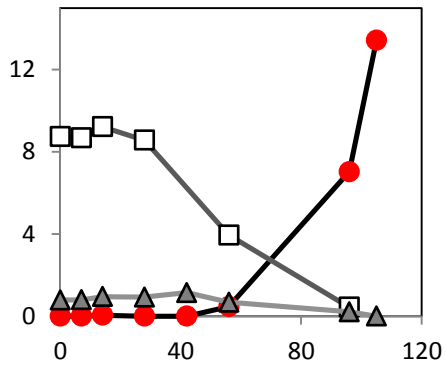

53

(B) MB + GM

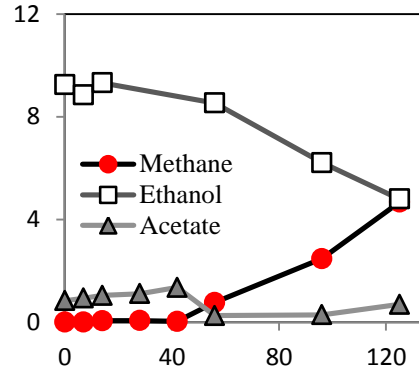

56

(C) MH + GM

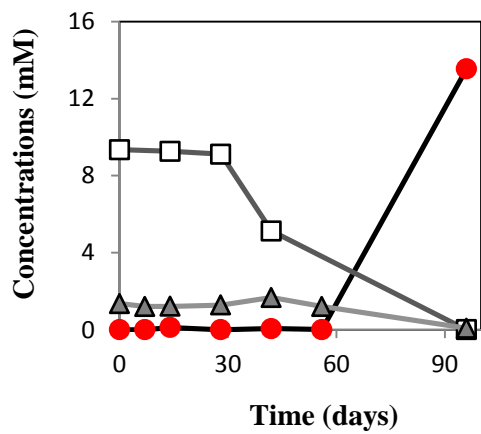

57

(D) MH + GM

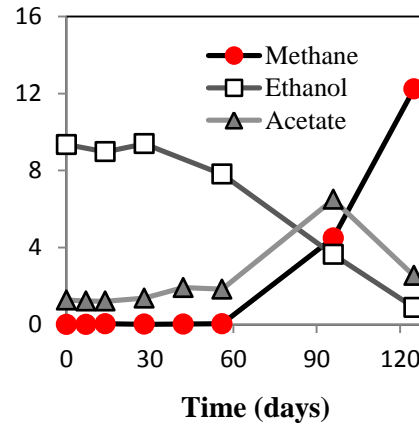

58

59

60

62 (Fig. S4) Replicate co-cultures of *Methanosarcina* sp. with *G. metallireducens* (A to D) feeding on  
 63 syntrophically oxidizing ethanol without the addition of external electron shuttles. MB;  
 64 *Methanosarcina barkeri*, MH; *Methanosarcina horonobensis*, GM; *Geobacter metallireducens*,  
 65 Circles; Methane, Squares; Ethanol, Triangles; Acetate .

66
